1                    Theory and practice of using cell strainers to sort  
2                                    *Caenorhabditis elegans* by size

3  
4 Vincent J. Lanier<sup>1</sup>, Amanda M. White<sup>1</sup>, Serge Faumont<sup>1</sup>, Shawn R. Lockery<sup>1\*</sup>

5  
6 <sup>1</sup> Institute of Neuroscience, 1254 University of Oregon, Eugene, OR USA

7  
8 \* Corresponding author

9 Email: [shawn@uoregon.edu](mailto:shawn@uoregon.edu)

10

## 11 **Abstract**

12 The nematode *Caenorhabditis elegans* is a model organism widely used in basic, translational,  
13 and industrial research. *C. elegans* development is characterized by five morphologically distinct  
14 stages, including four larval stages and the adult stage. Stages differ in a variety of aspects  
15 including size, gene expression, physiology, and behavior. Enrichment for a particular  
16 developmental stage is often the first step in experimental design. When many hundreds of  
17 worms are required, the standard methods of enrichment are to grow a synchronized population  
18 of hatchlings for a fixed time, or to sort a mixed population of worms according to size. Current  
19 size-sorting methods have higher throughput than synchronization and avoid its use of harsh  
20 chemicals. However, these size-sorting methods currently require expensive instrumentation or  
21 custom microfluidic devices, both of which are unavailable to the majority *C. elegans*  
22 laboratories. Accordingly, there is a need for inexpensive, accessible sorting strategies. We  
23 investigated the use of low-cost, commercially available cell strainers to filter *C. elegans* by size.  
24 We found that the probability of recovery after filtration as a function of body size for cell  
25 strainers of three different mesh sizes is well described by logistic functions. Application of these  
26 functions to predict filtration outcomes revealed non-ideal properties of filtration of worms by  
27 cell strainers that nevertheless enhanced filtration outcomes. Further, we found that serial  
28 filtration using a pair of strainers that have different mesh sizes can be used to enrich for  
29 particular larval stages with a purity close to that of synchronization, the most widely used  
30 enrichment method. Throughput of the cell strainer method, up to 14,000 worms per minute,  
31 greatly exceeds that of other enrichment methods. We conclude that size sorting by cell strainers  
32 is a useful addition to the array of existing methods for enrichment of particular developmental  
33 stages in *C. elegans*.

34

## 35 **Introduction**

36 The nematode *Caenorhabditis elegans* is a model organism widely used in basic, translational,  
37 and industrial research. It can be grown quickly (three-day generation time) and maintained in  
38 large numbers (tens of thousands) at negligible cost relative to zebrafish and rodents. It has the  
39 most comprehensively annotated genome of all model organisms. The entire set of cell divisions  
40 from oocyte to the 995 somatic cells of the mature worm has been mapped. Of the somatic cells,  
41 302 are neurons, and their anatomical connectivity has been described completely, a first in any  
42 organism. The *C. elegans* genome exhibits remarkably strong homologies to mammals including  
43 humans. It is estimated that 60–80% of *C. elegans* genes have a homolog in humans [1].  
44 Phenotypes of numerous human diseases have been replicated in *C. elegans* by manipulating  
45 these genes [2]. The worm also exhibits a range of complex, experience-dependent behaviors  
46 that provide models for similar behaviors in mammals with much larger brains [3,4]. These  
47 strengths are coupled with unsurpassed genetic tractability, including a substantial molecular

48 biological toolkit that accelerates research at multiple levels of organization, from genes to cells  
49 and behavior.

50 *C. elegans* development is characterized by five morphologically distinct stages, including  
51 four larval stages (L1–L4) and the adult stage, each separated by an observable molt. Stages differ  
52 in a variety of aspects including size, gene expression, physiology, and behavior. Thus, enrichment  
53 of a particular developmental stage is often the first step in experimental design. When several  
54 hundred worms are required, the method of enrichment used in most laboratories is to culture  
55 a developmentally synchronized population of hatchlings for a fixed time. This is accomplished  
56 by dissolving gravid adults in a caustic bleach solution to collect eggs, which remain viable  
57 (henceforth *bleach synchronization*). Hatchlings are synchronized by maintaining them overnight  
58 in the absence of food, causing them to enter developmental arrest at the L1 stage. It is possible  
59 that bleaching worms can have multigenerational detrimental effects on the physiology and  
60 behavior of progeny [5]. Moreover, bleaching cannot be used to enrich for particular larval stages  
61 after an experimental treatment such as application of a drug or changes in diet. The main  
62 alternative is to sort worms by size. This approach is advantageous because it does not require  
63 bleaching, and it generally has higher throughput. The highest throughput and purity is achieved  
64 by the COPAS Biosort (Union Biometrica, Holliston, MA, USA), a flow cytometer that  
65 accommodates *C. elegans* [6]. Though highly effective, the high cost of the Biosort limits its  
66 accessibility to most laboratories. Size sorting has the limitation that mutations and drug  
67 treatments can change worm dimension such that sorting protocols may require compensatory  
68 adjustments.

69 In response to the drawbacks of synchronization and the Biosort, a variety of microfluidic  
70 devices (chips) have been developed that sort worms by size, behavior, or physical properties.  
71 These include planar microsieves [7–12], chips that accentuate stage-specific behavioral  
72 responses to an applied electric field [13–16], inertial [17] or acoustic focusing [18], and  
73 impedance measurements [19]. However, because sorting chips are not commercially available,  
74 they must be made by the user, a process that requires expensive facilities and expertise in  
75 microfabrication. Indeed, cited-reference searches reveal that adoption by *C. elegans*  
76 laboratories of sorting chips published by bioengineering researchers is absent or extremely  
77 limited.

78 Accordingly, there is a need for simple, inexpensive sorting strategies that avoid the use  
79 of bleach, provide large yields at high-throughput, and utilize readily available materials. We  
80 investigated the use of mesh filters, such as commercially available cell strainers, to sort *C.*  
81 *elegans* by size. A cell strainer is a small plastic cup the bottom of which is a nylon mesh that has  
82 a well-defined opening size. Cell strainers are available in a wide range of mesh sizes, from 1 to  
83 1000  $\mu\text{m}$ .

84 Cell strainers are capable of separating very young worms (L1s, L2s) from mixed-stage  
85 populations [20,21]. Here we demonstrated the use of mesh filters to recover later

86 developmental stages. We found that recovery probability for cell strainers of three different  
87 mesh sizes is well described by logistic functions. Application of these functions to predict  
88 filtration outcomes revealed non-ideal properties of filtration by cell strainers that nevertheless  
89 enhanced filtration outcomes. Additionally, we found that serial filtration using a pair of strainers  
90 of different mesh sizes can be used to enrich for particular larval stages with a purity approaching  
91 that of synchronization, the most widely used enrichment method. Throughput of the cell-  
92 strainer method was 9,000 – 14,000 worms per minute, greatly exceeding that of all other  
93 enrichment methods. We conclude that size sorting by cell strainers is a useful addition to the  
94 array of existing methods for enrichment of particular developmental stages of *C. elegans*.

95

## 96 **Materials and Methods**

### 97 **Nematodes**

98 The reference strain of *C. elegans* (N2) was obtained from the *Caenorhabditis* Genetics Center at  
99 the University of Minnesota (St. Paul). Worms were grown at 20 C on 50 mm petri plates filled  
100 with NGM agarose and seeded with the OP50 strain of *E. coli* [22]. Plates of mixed-stage worms  
101 were obtained by transferring small cubes of worm-laden agarose (5 mm × 5 mm × 5 mm) to the  
102 plates and allowing cultures to grow until most of the *E. coli* were consumed (3 days).

103

### 104 **Solutions**

105 M9 buffer was used to wash worms off culture plates and to suspend worms during filtration.  
106 This buffer was prepared by combining 3 g KH<sub>2</sub> PO<sub>4</sub>, 6 g Na<sub>2</sub> HPO<sub>4</sub>, 5 g NaCl and 1 mL of 1 M  
107 MgSO<sub>4</sub>, and adding H<sub>2</sub>O to 1 L.

108

### 109 **Synchronization**

110 Worms were washed off a culture plate carrying a mixed-stage population of worms, including  
111 an ample number of gravid hermaphrodites. Worms were recovered into 15 mL centrifuge tubes,  
112 then pelleted by centrifugation at 2000 rpm for one minute. The supernatant was discarded, and  
113 then 1 mL of household bleach (8.25% solution of sodium hypochlorite) and 200 μL 5M KOH were  
114 added. While the tube was agitated, the bleaching progress was observed under a microscope.  
115 The reaction was stopped just before all traces of worm bodies disappeared, leaving only eggs  
116 behind (about 4 minutes). Tubes were topped off with M9 and centrifuged at 2000 RPM for one  
117 minute, followed by two additional M9 washes. Eggs were then transferred to foodless culture  
118 plates and allowed to hatch overnight at 20 C. The following day, hatchlings (L1) were washed off  
119 the unseeded plates with M9, recovered in 15 mL falcon tubes, and transferred to seeded *E. coli*  
120 plates.

121

122

123

## 124 **Filtration apparatus**

125 Cell strainers and accessories were purchased from PluriSelect USA, El Cajon, CA, USA. The  
126 filtration system comprised a nested stack of two cell strainers wherein the upper strainer had a  
127 larger mesh size than the lower strainer (Fig 1). A 25 mL loading funnel was inserted into the  
128 upper strainer. The lower strainer was inserted into an adapter which was inserted into the  
129 mouth of a stack of two 50 mL centrifuge tubes. The conical bottom of the upper tube was cut  
130 off to enable this tube to be inserted into the lower tube. The joint between tubes was sealed  
131 with tape or heat-shrink tubing.

132

133 **Fig 1. Filtration apparatus.** A. Left, strainer stack for pre-filtration. An 85  $\mu\text{m}$  strainer (orange) is stacked on a 20  $\mu\text{m}$   
134 strainer (green). A funnel is inserted into the 85  $\mu\text{m}$  strainer and the 20  $\mu\text{m}$  strainer is inserted into an adapter whose  
135 vent port is closed by a red cap. Right, strainer stack for 1-step passage, 40  $\mu\text{m}$  filtration. A 40  $\mu\text{m}$  strainer (blue) is  
136 stacked on a 5  $\mu\text{m}$  strainer (yellow). B. Micrographs of the mesh in 30, 40, and 50  $\mu\text{m}$  strainers. Scale-bars equal  
137 mesh size.

138

## 139 **Pre-filtration**

140 The purpose of this step was to remove debris and eliminate most of the of L1 and L2 worms,  
141 which were not part of this study. An 85  $\mu\text{m}$  cell strainer was stacked on a 20  $\mu\text{m}$  strainer (85/20).  
142 A vent port on the side of the adapter could be closed by a cap to prevent liquid from flowing out  
143 of the funnel or opened to initiate the filtration process. Approximately 2 mL of M9 buffer was  
144 added to each plate to suspend worms in fluid. Each plate was emptied into the funnel, then  
145 rinsed with a stream of M9 from a squirt bottle to transfer any remaining worms. The funnel was  
146 then topped up with M9 after which the vent port was opened and fluid was allowed to drain  
147 through the filters. Any fluid remaining in the top strainer was removed by applying gentle  
148 suction via a 10 mL syringe attached to the vent port. The port was again closed, and the funnel  
149 was re-filled with M9 and drained again. This process was repeated for a total of three *washes* of  
150 the funnel; each set of 3 washes is referred to as a single filtration *step*. To recover worms from  
151 the 20  $\mu\text{m}$  strainer, the stack was disassembled and the 20  $\mu\text{m}$  strainer was inverted over a glass  
152 funnel (40 mm diameter) inserted into a 10 mL centrifuge tube. Worms were recovered from the  
153 strainer by back flushing with a stream of M9 until no worms remained on the strainer,  
154 determined by examination under a stereomicroscope. As described in Results, pre-filtered  
155 worms were divided into populations  $P_1$  and  $P_2$  for subsequent filtration. This was done in one of  
156 two ways: (i) by resuspending pre-filtered worms by agitation of the 10 mL centrifuge tube, then  
157 placing half of the fluid in each of two 10 mL centrifuge tubes, or (ii) by pelleting the pre-filtered  
158 worms by settlement (5 min at -20 C), sampling  $P_1$  directly from the pellet, and resuspending the  
159 worms remaining in the pellet to form  $P_2$ . The two methods are functionally the same.

160

## 161 Size sorting

162 The size-sorting filtration protocols were similar to pre-filtration, including assembly of the filter  
163 system, transfer of worms from plates into the funnel, the number of washes in each filtration  
164 step, and the method for recovering worms from the strainer. The population of worms  
165 recovered after filtration was designated *R*. There were two main differences between pre-  
166 filtration and size-sorting protocols. (i) The mesh sizes of strainers in the filter stack were altered  
167 as described in Table 1 and Fig 2. (ii) A 10 mL syringe was attached to the vent port to regulate  
168 fluid flow from filters to the collection tube. Regulation was necessary because when filters in  
169 the range of 30 – 50  $\mu\text{m}$  were used, flow rates varied according to the number of worms in the  
170 funnel and the mesh size. Using the syringe to form a modest vacuum, we adjusted flow rate so  
171 that fluid height in the funnel dropped by approximately 2–3 mm/sec. Some experiments  
172 involved a single filtration step, whereas others involved two or three steps (Fig 2). Each filtration  
173 experiment was replicated at least 7 times; each replicate is called a *run*. After use, strainers were  
174 cleaned by sonication in distilled water, or by immersion in soapy water, rinsed, and dried with a  
175 stream of air. Strainers cleaned in this way could be used indefinitely.

**Table 1. Filtration protocols, number of filtration runs, and figures in which the associated data appear.**

| Filtration method                  | Number of steps | Number of plates/run | Number of runs | Figure |
|------------------------------------|-----------------|----------------------|----------------|--------|
| Pre-filtration                     | 1               | –                    | –              | –      |
| 1-step retention, 30 $\mu\text{m}$ | 1               | 4–7                  | 8              | 3A     |
| 1-step retention, 40 $\mu\text{m}$ | 1               | 4–7                  | 8              | 3B     |
| 1-step passage, 40 $\mu\text{m}$   | 1               | 4–7                  | 11             | 3C     |
| 1-step passage, 50 $\mu\text{m}$   | 1               | 4–7                  | 9              | 3D     |
| 3-step retention, 40 $\mu\text{m}$ | 3               | 9–10                 | 8              | 7B     |
| L4-YA Method 1                     | 2               | 6–8                  | 7              | 8A     |
| L4-YA Method 2                     | 1               | 10                   | 7              | 8B     |
| L4-YA Method 3                     | 2               | 10                   | 7              | 8C     |

176

177 **Fig 2.** Flow charts of the eight size-sorting filtration protocols tested in this study. Numbers next to strainer icons  
178 indicate mesh size ( $\mu\text{m}$ ). Worm symbols are color coded according to phase in the filtration process as shown in the  
179 key. *Arrows* indicate successive filtration steps, as defined in Materials and Methods. Although not strictly necessary,  
180 the 5  $\mu\text{m}$  filters in 1-step retention, 30  $\mu\text{m}$  and 1-step retention, 40  $\mu\text{m}$  were included for consistency with the 1-  
181 step passage, 40  $\mu\text{m}$  and 1-step passage, 50  $\mu\text{m}$  protocols.

182

## 183 Measurement of worm length

184 Worm lengths in  $P_1$  and *R* were measured by imaging worms on 50 mm, bacteria-free NGM  
185 plates. After pelleting by settlement (5 min at -20 C) worms were transferred to the plates in 2–  
186 5  $\mu\text{L}$  aliquots until the desired number of worms was obtained (usually, 3–6 aliquots per plate).  
187 Prior to measurement, worms were allowed to disperse for 5–10 min., a process sometimes

188 accelerated by puffs of air from a rubber bulb. Typically, all worms on 4–6 plates were imaged  
189 per experiment. Worms were immobilized by flowing CO<sub>2</sub> through a transparent chamber  
190 inverted over the plate. Worms were imaged at 5.64 μm/pixel using a macro lens (AF Micro-  
191 Nikkor 60 mm f/2.8D, Nikon, Japan). A series of still images tiling the entire surface of the plate  
192 was captured using a microscope camera (HDMI 1080P HD212, AmScope, Irvine, CA, USA).  
193 Images were combined into a single image stack which was submitted to WormLab software  
194 (MBF Bioscience, Williston, VT, USA) for automated length measurements. Length measurements  
195 excluded the worm's tail which was not resolved in the images.

196

## 197 **Developmental stages and dimensions**

198 The plot in S1 Fig shows the relationship between width and length used in this study. Widths of  
199 each developmental stage were taken from Table 1 of Atakan et al. [7]. Lengths of each stage  
200 were the center of the length ranges that define each stage according to data in WormAtlas [23].  
201 Plotting width ( $w$ , μm) against length ( $l$ , μm) yielded a linear relationship between L1 and YA,  
202 with  $w = 0.055l - 3.53$ .

203

## 204 **Estimation of throughput**

205 Throughput was defined as the number of worms filtered per minute of processing time. To  
206 estimate the number of worms that were loaded into the filtration apparatus per culture plate,  
207 a suspension of worms was obtained by washing each of 6 typical, mixed-stage culture plates  
208 with 2 mL M9 buffer. Worms were pelleted by settlement (5 min at -20 C) after which the volume  
209 of the suspension was adjusted to 5 mL. The pellet was resuspended by agitation. Resuspended  
210 worms were transferred to 11 foodless NGM plates (20 μL per plate). Worms were allowed to  
211 disperse for approximately 10 min, then counted in images of the plates taken on a flat-bed  
212 scanner (Epson V850 Pro, Los Alamitos, CA, USA). This procedure yielded an estimated worm  
213 density of 5.6 worms/μL in the 5 mL suspension, which is equivalent to  $4.7 \times 10^3$  worms/plate.  
214 Throughput estimates were based on a typical value of 10 plates per filtration run. Throughput  
215 was computed as  $N/T_i$  where  $N$  is the estimated number of worms on 10 plates ( $4.7 \times 10^4$ ), and  
216  $T_i$  is processing time of run  $i$  which began at the moment the contents of the first culture plate  
217 were loaded into the pre-filtration filter stack and ended when worms were recovered from the  
218 filtration stack. Throughput values in Table 2 are within-method mean processing time ( $n = 3$   
219 runs). Processing time  $T$  for bleach synchronization included culture time (48 hr.).

220

## 221 **Measurement of sorting purity**

222 Purity was defined as the proportion of worms in filtered distributions whose lengths were within  
223 the target range of developmental stages, L4–YA. Purity on each run was computed as the  
224 integral within the target zone of probability densities  $H_u(l)$  and  $H_f(l)$ . Purity for synchronized

225 populations was computed in a similar manner, with one exception. The peak of the mean  
226 probability density function for synchronized worms fell within the target zone but was not  
227 centered on it. Therefore, before computing purity values for each synchronization each run, we  
228 centered its histogram by shifting it 39  $\mu\text{m}$  to the left. This approach eliminated the spurious  
229 reduction in purity that would have resulted from the slight mismatch between the synchronized  
230 distribution and the target range.

231

## 232 **Statistical analyses**

233 Two-tailed  $t$ -tests were used to compare sorting purities between filtered and unfiltered  
234 populations, and between populations filtered by different methods. Degrees of freedom  $\nu$  in  $t$ -  
235 tests were computed, without the assumption of equal variances, as

236

$$237 \quad \nu = \frac{\left(\frac{s_1^2}{n_1} + \frac{s_2^2}{n_2}\right)^2}{\frac{\left(\frac{s_1^2}{n_1}\right)^2}{n_1 - 1} + \frac{\left(\frac{s_2^2}{n_2}\right)^2}{n_2 - 1}}$$

238

239 where  $s_i$  is the standard deviation of purity for method  $i$  and  $n_i$  is the number of runs for that  
240 method. Statistical tests were implemented in Igor Pro (Wavemetrics, Portland, OR, USA).

241

## 242 **Results**

243 Previous studies used filtration through commercially available cell strainers as a means of  
244 enriching for worms in the first larval stage (L1), or the first and second larval stages (L1, L2), from  
245 mixed-stage populations [20,21]. We tested the ability of cell strainers to enrich for later stages,  
246 including L4s and young adults (YA). To ensure that the filtration methods developed here could  
247 be integrated easily into common workflows, we adopted widely used methods to create mixed-  
248 stage cultures on standard agarose plates (Materials and Methods). At the start of each filtration  
249 experiment, worms were washed off culture plates and pre-filtered to remove debris and L1–L2  
250 stage worms. This was done using an 85  $\mu\text{m}$  cell strainer stacked on a 20  $\mu\text{m}$  cell strainer (85/20).  
251 Worms recovered from the 20  $\mu\text{m}$  filter were then subjected to one of eight different filtration  
252 protocols selected according to the purpose of the experiment (Fig 2).

253

## 254 **Mathematical models of filtration**

255 We started with the simple case of 1-step filtration using a single cell strainer (Fig 2A-D, Fig 3A-  
256 D). For each run, pre-filtered worms were divided into separate populations,  $P_1$  and  $P_2$ . The  
257 lengths of worms in a subsample of  $P_1$  were measured to construct a histogram estimating the



258 length distribution of the worms to be loaded into the funnel of the filtration setup. We refer to  
259 the histogram of  $P_1$  as the *unfiltered* distribution,  $H_u(l)$ . Unfiltered distributions varied between  
260 experiments, but there was a consistent bias toward earlier developmental stages (Fig 3, black  
261 traces), which reflects the particular worm culturing protocol we used (Methods and Materials).  
262 Population  $P_2$  was loaded into the funnel, from which we recovered the population  $R$ , containing  
263 size-sorted worms. The lengths of worms in a subsample of  $R$  were measured to construct a  
264 histogram estimating the length distribution of *filtered* worms,  $H_f(l)$ . These histograms,  
265 converted to units of probability density and averaged across runs, and named  $\bar{H}_u(l)$  and  $\bar{H}_f(l)$ ,  
266 are shown in Fig 3. An empirically derived length-stage relationship was used to infer which  
267 developmental stages were obtained in  $\bar{H}_u(l)$  and  $\bar{H}_f(l)$  (Materials and Methods and S1 Fig).

268

269 **Fig 3. Mean distributions of filtered and unfiltered worms in 1-step filtration experiments.** A-D. Mean filtered  
270 distributions,  $\bar{H}_f(l)$  (*red traces*) and mean unfiltered distributions,  $\bar{H}_u(l)$  (*black traces*). Diamonds indicate the length  
271 of worms having a diameter equal to the mesh size. Error bars, SEM.

272

273 Like any sieve, a cell strainer can be used in two *modes*, retention and passage. The  
274 distribution of worms recovered from the top surface of the strainer (*retained fraction*) was  
275 shifted toward larger worms relative to the unfiltered distribution, whereas the length  
276 distribution of worms recovered from the fluid that passed through the filter (*passed fraction*)  
277 was shifted toward smaller worms (Fig 3). This pattern indicates that cell strainers used in our  
278 experiments (30  $\mu\text{m}$ , 40  $\mu\text{m}$ , and 50  $\mu\text{m}$ ) can be used to obtain populations enriched for larger or  
279 smaller worms in the length range 400 – 1200  $\mu\text{m}$  (L3 and older).

280 The diamonds in Fig 3 indicate the length of worms having a width equal to the mesh size  
281 (S1 Fig). In retention graphs, non-zero points to the left of the diamonds indicate worms that  
282 were retained even though they were narrower than the mesh size. We hypothesize that  
283 retention of narrower worms occurs when worms land on the strainer mesh roughly parallel it.  
284 In passage graphs, non-zero points to the right of the diamonds signify worms that were wider  
285 than the mesh size, but nevertheless passed through the filter. The passage of wider worms might  
286 be explained by deformation by fluid pressure as they pass through the filter.

287 Any sieve has a characteristic *filter function*, defined as the probability  $p$  that a particle  
288 will be recovered as a function of its size,  $x$ . This probability is computed as

289

$$p(x) = \frac{F(x)}{S(x)} \quad (1)$$

290

291 where  $F(x)$  is the number of recovered particles in bin  $x$  and  $S(x)$  is the number of particles in  
292 bin  $x$  in the starting distribution. The filter function is useful because it is independent of the  
293 starting distribution of particle sizes, making it a universal statement of filter selectivity.  
294 Moreover, it can be used to predict filtration outcomes with respect to any starting distribution

295 simply by bin-wise multiplication of the filter function and the starting distribution; such  
296 predictions can facilitate design of custom filtration protocols. In contrast, the filtered  
297 distribution is strongly dependent on the starting distribution: the greater the number of  
298 particles in a given bin in the starting distribution, the greater the number of recovered particles  
299 in the corresponding bin the filtered distribution (except where  $p(x) = 0$ ).

300 Given the advantages of filter functions, we wished to recover these functions for the cell  
301 strainers used in this study. In this instance, equation (1) becomes

302

$$p(l) = \frac{F(l)}{S(l)} \quad (2)$$

303

304 where  $F(l)$  is the raw length histogram of all worms recovered after filtration (population  $R$ ) and  
305  $S(l)$  is the raw length histogram all worms loaded into the funnel (population  $P_2$ ). In retention  
306 filtration,  $p(l)$  approaches unity in the limit of large  $l$ ; in passage filtration,  $p(l)$  approaches unity  
307 in the limit of small  $l$ . To compute  $p(l)$  exactly, it would be necessary to measure the lengths of  
308 *all* worms in the  $R$  and  $P_2$  populations. However, because our filtration methods accommodate  
309 very large numbers of worms, it was not possible to measure the length of every worm. We relied  
310 instead on samples of these populations (Materials and Methods, Measurement of worm length).  
311 Nevertheless, given that our sampling method is unbiased, the forms of  $H_f(l)$  and  $H_u(l)$  should  
312 closely resemble the forms of  $F(l)$  and  $S(l)$ , respectively. Moreover, their ratio should have the  
313 same form as  $p(l)$ . However, because of sampling, the relative amplitudes of  $H_f(l)$  and  $H_u(l)$   
314 will almost certainly differ from the relative amplitudes of  $F(l)$  and  $S(l)$ , so the limiting values of  
315  $p(l)$  will generally not be unity. Nevertheless, the expected limiting values of  $p(l)$  provided a  
316 constraint that we used to correct for sampling. In particular, we computed

317

$$p'(l) = \frac{aH_f(l)}{H_u(l)} \quad (2)$$

318

319 where  $a$  is a sampling correction factor whose value was chosen to ensure the expected limiting  
320 behavior of  $p(l)$ . Specifically, we set  $a = 1/\bar{X}_n$ , the reciprocal of the mean of the  $n$  extremes  
321 values of  $H_f(l)/H_u(l)$  for each run. The value of  $n$  was selected to optimize the fitting procedure  
322 described immediately below; the sampling correction procedure is illustrated in S2 Fig.

323 The dependent variable in our filtration data is the probability of a favorable *binary*,  
324 *categorical* outcome (recovery of a worm from the filtration process, vs. failure of recovery). The  
325 independent variable is worm length. The the standard equation for relating the probability of  
326 binary outcomes to a continuous independent variable is called the *logistic function*. The  
327 standard statistical method for analyzing binary outcomes is *logistic regression*[24] which entails

328 fitting the general form of the *logistic equation* to a specific data set. The logistic equation is an  
329 exponential sigmoid  
330

$$p(x) = \frac{1}{1 + \exp(-(x - \mu)/s)} \quad (3)$$

331  
332 where  $x$  is the independent variable,  $\mu$  is a location parameter (the point on the  $x$  axis where  
333  $p(x) = 0.5$ ), and  $s$  is a scale parameter. It ranges from zero at large negative values of  $(x - \mu)$   
334 to unity at large positive values of  $(x - \mu)$ . The logistic equation is rotationally symmetric about  
335 the point  $(\mu, 0.5)$ . In its rotated form, it ranges from unity to zero.

336 We found that after correction for sampling, mean retention data (Fig 4A,B, black  
337 symbols) were well fit by a logistic function having the form

$$p'_r(l) = \frac{1}{1 + \exp(-(l - l_o)/s)} \quad (4)$$

338  
339 where  $\mu = l_o$ , the length at which the  $p'_r(l) = 0.5$ , (Fig 4A,B, red traces). Mean passage data were  
340 well fit by the rotated form of equation (4)

$$p'_p(l) = 1 - \frac{1}{1 + \exp(-(l - l_o)/s)} \quad (5)$$

342  
343 (Fig 4B,C). Parameters for each fitted function are given in S1 Table, including the value of  $n$  used  
344 to determine the sampling correction factor  $a$ .

345  
346 **Fig 4. 1-step filter functions extracted from the data in Fig 3.** A-D. *Gray traces* show the value of the ratio on the  
347 right-hand side of equation 2 for each run, after multiplication by the constant  $C$  (see text), such that the mean of  
348 data points in the asymptotic region is 1. Number of data points in the asymptotic region used to compute  $C$  is given  
349 in S1 Table. *Black symbols* indicate means of gray traces at each length. Error bars, SEM. *Red traces* are fits of  
350 equation 3 or 4 to the means in each panel. *Diamonds* indicate the length of worms having a diameter equal to the  
351 mesh size.

352  
353 To validate the filter functions, we retroactively predicted the length distributions of  
354 filtered worms by multiplying the mean unfiltered distribution  $\bar{H}_u(l)$  by the filter function. The  
355 predicted filtered distributions closely matched the actual filtered distributions,  $\bar{H}_f(l)$  (Fig 5A-D).  
356 We conclude that the filter functions accurately represent the filtration process despite  
357 considerable run-to-run variability in the data (Fig 4, gray traces).

358  
359 **Fig 5. Validation of 1-step filter functions.** A-D. In each panel, the unfiltered length distributions  $\bar{H}_u(l)$  in the  
360 corresponding panel of Fig 3 were multiplied by the filter functions in the corresponding panel of Fig 4, yielding the

361 *blue trace* (Prediction). The *red trace* (Data) shows the actual filtered distribution  $\bar{H}_f(l)$  from the corresponding panel  
362 of Fig 3. Error bars, SEM.

363

## 364 Comparison with sieving theory

365 We next tested the hypothesis that filtration of *C. elegans* conforms to the predictions of ideal  
366 sieving theory in two distinct experiments. The first experiment involved a multi-step filtration  
367 procedure in which a filtered fraction is re-filtered one or more times through the same filter. In  
368 the simple example of a two-step retention procedure, the retained fraction is filtered a second  
369 time. By basic laws of probability, the probability that a particle is retained after the first *and* the  
370 second filtration step is the product of the retention probabilities for each step,  $p(x)^2$ . In the  
371 case of  $n$  filtration steps, the retention probability is  $p(x)^n$ .

372

373 **Fig 6. Non-ideal properties of 3-step filtration.** A. Comparison of theoretical and actual filter functions. The *red trace*  
374 is 1-step retention, 40  $\mu\text{m}$  filter function from Fig 4B. The *black trace* is the 1-step filter function raised to the third  
375 power. The *dashed black trace* is the actual three-step filter function obtained by the analysis shown in C. The *blue*  
376 *trace* is the difference between the 1-step and 3-step filter functions. B. Filtered distributions,  $\bar{H}_f(l)$  (*red trace*), and  
377 unfiltered distributions,  $\bar{H}_u(l)$  (*black trace*). The diamond indicates the length of worms having a diameter equal to  
378 the mesh size. Error bars, SEM. C. Filter function for 3-step filtration. *Gray traces* show the value of the ratio on the  
379 right-hand side of equation 2 for each run, after multiplication by the constant  $C$  (see text) so that the mean of data  
380 points in the asymptotic region is 1. *Black symbols* indicate means of gray traces at each length. Error bars, SEM. The  
381 *red trace* is the fit of equation 3 to the mean data. Number of extreme data points in the asymptotic region used to  
382 compute  $C$  is given in S1 Table. D. Validation of the 3-step filter function. The unfiltered length distribution  $\bar{H}_u(l)$  in  
383 B was multiplied by the filter function in C, yielding the *blue trace* (Prediction). The *red trace* (Data) shows the actual  
384 filtered distribution  $\bar{H}_f(l)$  in B.

385

386 The second experiment considered the relationship between the probabilities of  
387 retention and passage. In an ideal sieving process, particles are either passed or retained by the  
388 sieve, and all retained particles are recovered from it. Mathematically,  $p_r(x) + p_p(x) = 1$ ,  
389 where  $p_r(x)$  is the probability of retention,  $p_p(x)$  is the probability of passage. In the case of the  
390 40  $\mu\text{m}$  cell strainer, for which we obtained filter functions for both filtration modes, we found  
391 that these functions did not add to unity (Fig 6, dashed trace). In particular, there was a significant  
392 probability of a worm being neither passed nor retained, which is computed as  $1 - [p_r(l) +$   
393  $p_p(l)]$  (Fig 7, blue trace). This is a second respect in which filtration of worms by cell strainers  
394 does not conform to sieving theory.

395

396 However, it is notable that the probability of being neither passed nor retained reached  
397 its maximum at a length corresponding to a width almost equal to the mesh size (40  $\mu\text{m}$ , Fig 7,  
398 diamond). This correspondence predicted that some worms are be captured by the mesh. To test  
399 this prediction, we filtered a starting population using the 1-step retention, 40  $\mu\text{m}$  method. We  
400 then back flushed the strainer in the usual way (Materials and Methods), submerged the strainer  
in M9 buffer, and inspected the mesh under a stereomicroscope. We found a significant number

401 of worms whose heads were caught in the mesh, with their tails free to engage in normal  
402 swimming movements (S1 Video). Furthermore, the fact that some worms are caught by the  
403 strainer means that the fraction of worms recovered in retention mode actually represents  
404 worms that were retained *and* subsequently released by the filter.

405 The finding that worms can be caught by the strainer helps explain the fact that sieving  
406 theory does not correctly predict the outcome of multi-step filtration (Fig. 6A). As noted above,  
407 with successive filtration steps, the probability of retaining and releasing longer worms increases  
408 whereas the probability of passing shorter worms decreases. A possible explanation for increased  
409 retention of longer worms is that the number of mesh openings of the right size to capture such  
410 worms is reduced as these openings progressive become more occupied by captured worms. A  
411 possible explanation for decreased retention of shorter worms is that, being narrower, they are  
412 captured less tightly during initial filtration steps, and are eventually ejected from the mesh by  
413 fluid pressure in subsequent filtrations.

414 These findings highlight the utility of theoretical filter functions in two key respects.  
415 Without knowledge of the 40  $\mu\text{m}$  strainer's retention function, it would have been impossible to  
416 characterize the non-ideal properties of this strainer. On the other hand, we have shown that  
417 filter functions can be predictive. In particular, the 40  $\mu\text{m}$  retention and passage functions  
418 correctly predicted trapping, another finding that would not have been possible by simple  
419 inspection of filtered and unfiltered length histograms. Thus, the filter functions provided a  
420 means of elucidating the mechanics of worm filtration using cell strainers. This knowledge will be  
421 useful when designing novel filtration protocols, including filtration of other species of  
422 nematodes.

423  
424 **Fig 7. Non-ideal properties of 1-step filtration.** The *black* and *red* traces are the filter functions for 1-step retention,  
425 40  $\mu\text{m}$  (Fig 4B) and 1-step passage, 40  $\mu\text{m}$  (Fig 4C), respectively. In the ideal case, the sum of filter functions for  
426 retention and passage by the same filter should equal 1. However, for the 40  $\mu\text{m}$  cell strainer it does not (*gray dashed*  
427 *trace*). The probability of being neither passed nor retained (*blue trace*) is maximal at 795  $\mu\text{m}$ , a length corresponding  
428 to a width of 40.2  $\mu\text{m}$  (*diamond*) which is close to the mesh size. This finding suggests that worms having a width  
429 approximately equal to the mesh size have a higher probability of being captured by the mesh than wider or  
430 narrower worms.

431  
432

### 433 **Filtration as an alternative to bleach synchronization**

434 Guided by our knowledge mechanics of worm filtration by cell strainers, we sought to devise a  
435 filtration protocol that might serve as an alternative to synchronization. As proof of concept, we  
436 sought to obtain populations of worms in the range dominated by developmental stages L4 and  
437 YA. In the N2 reference strain, worms in this range vary in width from 35 to 42  $\mu\text{m}$  [7]. Cell  
438 strainers closest to this range are 30  $\mu\text{m}$  and 40  $\mu\text{m}$  strainers. We tested three filtration methods,  
439 each based on a 40  $\mu\text{m}$  strainer to exclude older adult worms and a 30  $\mu\text{m}$  strainer to capture L4s

440 and YAs. *L4–YA Method 1* (Fig 2F) was a 2-step approach: a 40  $\mu\text{m}$  strainer in passage mode,  
 441 followed by re-filtration of the recovered worms with a 30  $\mu\text{m}$  strainer in retention mode (Fig  
 442 8A). *L4–YA Method 2* (Fig 2G) was a 1-step approach using a 40  $\mu\text{m}$  strainer stacked on a 30  $\mu\text{m}$   
 443 strainer (40/30); worms were recovered from the 30  $\mu\text{m}$  filter (Fig 8B). *L4–YA Method 3* (Fig 2H)  
 444 was a 2-step approach using the 40/30 stack, in which worms recovered from the 30  $\mu\text{m}$  strainer  
 445 in step 1 were filtered a second time (Fig 8C). Length histograms of filtered worms were well fit  
 446 by gaussian functions, parameters of which are given in Table 2. L4–YA Methods 2 and 3 yielded  
 447 distributions with peaks in the target range, whereas the peak of L4–YA Method 1 was shifted  
 448 toward longer worms (Fig 8 and Table 2). Differences in the dynamics of fluid flow between  
 449 stacked and non-stacked strainers might account for this shift.  
 450

**Table 2. Performance metrics of filtration methods for enrichment of particular larval stages.**

| Parameter                                                 | Method 1        | Method 2                      | Method 3                     | Synch                     |
|-----------------------------------------------------------|-----------------|-------------------------------|------------------------------|---------------------------|
| Total number of worms measured                            | 3545            | 6333                          | 5793                         | 2175                      |
| Grand mean of run means (length, $\mu\text{m}$ )          | 872 $\pm$ 59    | 778 $\pm$ 53                  | 773 $\pm$ 27                 | 812 $\pm$ 35              |
| Mode <sup>a</sup> ( $\mu\text{m}$ )                       | 825             | 725                           | 775                          | 825                       |
| Gaussian means $\pm$ std. dev. in Fig 8 ( $\mu\text{m}$ ) | 867 $\pm$ 159   | 754 $\pm$ 165                 | 768 $\pm$ 141                | 826 $\pm$ 101             |
| Mean processing time (min)                                | 6.4 $\pm$ 0.1   | 3.3 $\pm$ 0.2                 | 5.2 $\pm$ 0.5                | 2880 <sup>b</sup>         |
| Mean throughput (worms/min)                               | -               | 14,100 <sup>c</sup> $\pm$ 690 | 9,100 <sup>c</sup> $\pm$ 810 | 1.63 <sup>d</sup>         |
| Mean yield                                                | -               | 1,130 <sup>e</sup> $\pm$ 160  | 755 <sup>e</sup> $\pm$ 260   | 242 <sup>f</sup> $\pm$ 77 |
| Mean purity <sup>g</sup>                                  | 0.35 $\pm$ 0.14 | 0.45 $\pm$ 0.079              | 0.54 $\pm$ 0.076             | 0.65 $\pm$ 0.085          |

Metrics for synchronized worms are provided for comparison. Means are shown  $\pm$  std. dev. <sup>a</sup>Most frequent worm length. <sup>b</sup>L1 larvae were grown for 48 hr. <sup>c</sup>Based on ten 5 cm plates of worms washed onto the funnel. <sup>d</sup>Based on the estimated number of worms in one mixed stage culture plate (Materials and Methods) <sup>e</sup>Lower-bound yield. <sup>f</sup>Yield from bleaching one mixed-stage culture plate. <sup>g</sup>The purity of unfiltered worms was 0.191  $\pm$  0.08 (std. dev.).

451  
 452 **Fig 8. Enrichment by filtration for particular developmental stages.** The goal was to enrich for developmental stages  
 453 L4 and YA (*Target*) utilizing a 40  $\mu\text{m}$  strainer and a 30  $\mu\text{m}$  cell strainer in three distinct protocols (L4–YA Methods 1-  
 454 3, Fig 2). A-C. Filtered distributions,  $\bar{H}_f(l)$  (*colored traces*), and unfiltered distributions,  $\bar{H}_u(l)$  (*black traces*).  
 455 *Diamonds* indicate the length of worms having a diameter equal to the two mesh sizes. A. L4–YA Method 1, filtration  
 456 by a 40  $\mu\text{m}$  strainer in passage mode, followed by re-filtration of the recovered worms with a 30  $\mu\text{m}$  strainer in  
 457 retention mode. B. L4–YA Method 2, 1-step filtration by a 40  $\mu\text{m}$  strainer stacked on a 30  $\mu\text{m}$  strainer. C. L4–YA  
 458 Method 3, 2-step filtration in which worms recovered from the 30  $\mu\text{m}$  filter in Method 2 were passed through the  
 459 stack a second time. D. Comparison of synchronization (*black trace*) and L4–YA Method 3 (*blue trace*). To facilitate  
 460 comparison of synchronization and L4–YA Method 3, the distribution of the latter was shifted to the right by 50  $\mu\text{m}$ .  
 461 A-D. Error bars, SEM.

462  
 463 Methods of enrichment by size-sorting can be compared in terms of throughput, yield,  
 464 and purity. The literature on *C. elegans* microfluidic size-sorting devices defines throughput as  
 465 the number of worms that can be sorted per minute (wpm). Throughput using the Biosort is  
 466 approximately 180 wpm (Erik Andersen, personal communication). In the case of microfluidic

467 devices, throughput when sorting from mixed-stage populations varies from 4 wpm [9,13] to 200  
468 wpm [10], depending on device design. In this study, the highest throughput was obtained using  
469 L4–YA Methods 2 and 3, for which we used 10 culture plates per run. To compute throughput,  
470 we estimated the number of worms in 10 plates (see Materials and Methods), divided this  
471 number by the processing time for each run, and computed the within-method mean across runs.  
472 Throughput ranged from approximately 7,000 to 14,000 wpm, exceeding the maximum  
473 throughput of previous size sorting methods (200 wpm) by a factor of 35 to 70.

474 Mean yields for L4–YA Methods 2 and 3 are given in Table 2. These values are lower-  
475 bound estimates because it was impractical to measure every worm in the filtered population.  
476 However, these estimates suggest that both methods can generate hundreds to thousands of  
477 worms per run.

478 Purity was defined as the proportion of worms whose lengths were within the target zone  
479 (Fig 8A-D), which extends from 686  $\mu\text{m}$  (L4 / L4-YA) to 838  $\mu\text{m}$  (L4-YA / YA). Purity on each run  
480 was computed as the integral within the target zone of probability densities  $H_u(l)$  and  $H_f(l)$ .  
481 Purity for synchronized populations was computed in a similar manner, with one exception. The  
482 peak of the mean probability density function for synchronized worms fell within the target zone  
483 but was not centered on it (Fig 8D). Therefore, before computing purity values for each  
484 synchronization each run, we centered its histogram by shifting it 39  $\mu\text{m}$  to the left. This approach  
485 eliminated the spurious reduction in purity that would have resulted from the slight mismatch  
486 between the synchronized distribution and the target zone.

487 Mean purity for unfiltered populations associated with individual runs of L4–YA Methods  
488 2 and 3 was 0.191 ( $\pm$  0.080 std. dev.,  $n = 15$  replicates). Mean purities for filtered and  
489 synchronized populations are given in Table 2. Mean purities for L4–YA Methods 2 and 3, whose  
490 filtered distributions were well aligned with the target zone (Fig 8B,C), exceeded those of  
491 unfiltered populations (L4–YA Method 2 vs. Unfiltered:  $t = 7.00$ ,  $df = 11.89$ ,  $p = 1.50 \times 10^{-5}$ ; L4–YA  
492 Method 3 vs. Unfiltered:  $t = 9.46$ ,  $df = 11.51$ ,  $p = 9.01 \times 10^{-7}$ ); this comparison shows that these  
493 methods had a significant effect on purity. Furthermore, the purity of L4–YA Method 3 was  
494 greater than that of L4–YA Method 2 ( $t = 2.26$ ,  $df = 11.98$ ,  $p = 0.043$ ), indicating that the second  
495 step of filtration improved performance substantially. We next obtained the length distribution  
496 for bleach synchronized worms (Fig 8D). The purity of synchronization (Materials and Methods)  
497 was greater than that of L4–YA Method 3 ( $t = 2.50$ ,  $df = 13.28$ ,  $p = 0.026$ ). The peak of the  
498 distribution of synchronized worms was in the target range, as expected (Table 2), but not  
499 centered on it. To facilitate visual comparison of synchronization and L4–YA Method 3, we  
500 aligned the peaks of the two distributions by shifting the distribution of L4–YA Method 3 to the  
501 right by 50  $\mu\text{m}$ . Inspection of this graph emphasizes the fact that although the purity of  
502 synchronization is greater than the purity of L4–YA Method 3, the latter may be sufficient, in  
503 practical terms, especially in applications where accessibility, high throughput, and yield are  
504 priorities.

505

## 506 **Discussion**

507 We combined theory and experiment to investigate the use of cell strainers to enrich for  
508 particular developmental stages of *C. elegans* by filtration. We found that this method of  
509 filtration can be described by a filter function that worm length to the probability of recovery  
510 (retention or passage), with length being a proxy for developmental stage. Recovery in both  
511 modes was well-described by logistic functions, which are rotationally symmetric about the point  
512 at which probability is 0.5. This symmetry suggests that passage and retention may be governed  
513 by a single process, possibly how tightly worms of a given length, hence a given width, fit within  
514 the mesh. Cell strainers are a generic laboratory commodity, with identical meshes regardless of  
515 manufacturer. Thus, our main findings are not manufacturer dependent.

516 We found that filtration of worms by cell strainers is consistent with ideal sieving theory  
517 [25] in some, but not all, respects. The correspondence we observed between actual and  
518 retroactively predicted distributions of filtered worms is consistent with theory (Fig 5A-D, 7D).  
519 This finding is significant because it means users can predict the outcome of 1-step filtration  
520 based on their particular starting distributions, which is highly variable across strains,  
521 experimenters, and laboratories. There were two main inconsistencies. First, in the ideal case,  
522 the filter function for multistep filtration through the same filter is equal to the 1-step filter  
523 function raised to the power of the number of filtration steps. This was not the case for 3-step  
524 retention, 40  $\mu\text{m}$  filtration (Fig 6A). Such inconsistencies are not surprising. Second, in an ideal  
525 sieving process, particles are either passed or retained by the sieve; none are trapped by it. This  
526 was not the case for 1-step retention, 40  $\mu\text{m}$  filtration, as there was a significant probability that  
527 worms were not released by the filter (Fig 6). Indeed, inspection of the filter after washing  
528 showed that some worms remained trapped in the mesh (Supplemental Video 1). Ideal sieving  
529 theory is based on rigid, spheroid particles whereas worms are flexible, elongated, and capable  
530 of self-movement. In practical terms, these inconsistencies mean that the outcome of a multistep  
531 filtration procedure cannot be predicted *a priori*; it must be determined experimentally.

532 *C. elegans* enrichment methods can be compared along multiple dimensions, including  
533 throughput, purity, accessibility, yield, and detrimental physiological effects. Fig 9 compares  
534 currently available methods along the first three dimensions. Throughput data fall into two  
535 domains (low and high) whereas the purity data fall into three domains (low, intermediate, and  
536 high). Accessibility has two levels, low (grey) and high (blue). Microfluidic chips and Biosort  
537 occupy the low-throughput, high-purity, low-accessibility sector. These methods are best suited  
538 to applications in which high purity is sufficiently important to justify the effort and expense  
539 required to achieve it. Filtration by L4-YA Methods 2 and 3 occupies the high-throughput,  
540 intermediate-purity, and high-accessibility sector. These methods are best suited to applications  
541 that require large numbers of worms that can be obtained quickly and are compatible with  
542 intermediately levels of purity. Synchronization occupies the low-throughput, intermediate-



543 purity, high accessibility sector. This method is best suited to low throughput applications in  
544 which concerns about the detrimental effects of bleach are outweighed by the modest increase  
545 in purity over L4–YA Method 3.

546

547 **Fig 9. Comparison of enrichment methods along the dimensions of throughput, purity, and accessibility.**  
548 Throughput is defined as the number of worms processed per minute. Purity is defined as the proportion of worms  
549 whose lengths are within the target zone (L4 and YA) when sorting from a mixed-stage population. The mean purity  
550 of unfiltered worms is indicated by the blue vertical line. Accessibility (high, *blue symbols*; low, *black symbols*) is  
551 defined as the inverse of the magnitude of resources, facilities, and training required to make use of the method.  
552 Microfluidic chips and Biosort occupy the low-throughput, high-purity, low-accessibility sector. The L4–YA Methods  
553 2 and 3 and synchronization occupy the high-throughput, intermediate-purity, and high-accessibility sector. Error  
554 bars and shading, 95% CI.

555

## 556 **Limitations**

557 Several limitations should be kept in mind when designing new filtration protocols using cell  
558 strainers. (1) Filter functions obtained here are limited to filtering strains that closely resemble  
559 N2 in width and length at each developmental stage. These functions will likely not apply to  
560 strains carrying mutations that alter worm diameter (e.g., “dumpy” (*dpy*) and “multi-vulva” (*muv*)  
561 mutants) or length (e.g., “small” (*sma*) and “long” (*lon*) mutants). Nor will they necessarily apply  
562 to populations that have undergone treatments, such as drugs or altered temperature, that  
563 change worm size.

564 These functions also might not apply to mutants (e.g., “uncoordinated” (*unc*) mutants) or  
565 treated populations having reduced swimming ability, as this defect could alter the orientation  
566 in which worms contact and subsequently interact with the mesh (Supplemental Video 1, blue  
567 arrow at  $t = 4$  sec). It will therefore be necessary to experiment with a range of different mesh  
568 sizes for sorting such strains. (2) Cell strainers are generally available in mesh-size increments of  
569 10  $\mu\text{m}$ , which can limit the precision of the sorting process, especially in the case of stacked  
570 filtration to enrich for a particular larval stage. However, mesh fabrics from which custom  
571 strainers could be constructed are available in finer increments (S2 Table), opening the possibility  
572 of replacing the mesh of a cell strainer with a mesh of intermediate mesh size. (3) When enriching  
573 for particular larval stages, the purity of filtered populations in this study was less than the purity  
574 of synchronized populations (Table 2). This problem could be mitigated by increasing the number  
575 of filtration steps, as L4–YA Method 3 (2 steps) had significantly higher purity than L4–YA Method  
576 2 (1 step).

577

## 578 **Modifications**

579 Several modifications of the present protocols could expand the utility of the filtration approach.  
580 Stacked filtration based on other pairs of mesh sizes could be utilized to enrich for stages other  
581 than L4–YA. For example, a 50/40 stack could be used to enrich specifically for YA worms used in

582 DNA injections. Microfluidic sorting devices that enrich for multiple developmental stages  
583 simultaneously have been demonstrated [7,11,12,15]. This functionality could be replicated with  
584 cell strainers by increasing the number of strainers in a stack. For example, a 40/30/25/20 stack  
585 could be used to enrich simultaneously for larval stages L4 and L3 in addition to the L4-YA mixture  
586 obtained from the 40/30 stack (Fig 8). Another modification is to increase filtration throughput  
587 and yield by custom fabrication of larger strainers, which could be as simple as replacing the  
588 bottom of plastic drinking cups with mesh fabric.  
589

## 590 Applications

591 The simplest filtration method uses a single cell strainer. This approach could be utilized to enrich  
592 for adult worms from mixed-stage populations by using a strainer that passes all stages except  
593 adults. The stringency of this type of enrichment could be improved by multi-step filtration over  
594 the strainer, as shown in Fig 7A. This approach could facilitate behavioral, genetic, and genomic  
595 experiments by enabling the use of very large populations of adults. Single-strainer filtration  
596 could also be used either to select or exclude morphological mutants when mixed with wild type  
597 worms. For example, *dpy* or *muv* mutants could be selected or excluded using a cell strainer that  
598 passes wild type worms but not these mutants. As the *dpy* locus is frequently used as a balancer  
599 for maintaining strains carrying lethal mutations, this approach could increase sample sizes in  
600 studies of lethal genes, one of the largest gene classes in *C. elegans*. We have also shown that  
601 stacked-strainer filtration can be used to enrich for particular larval stages and that the purity of  
602 this approach can be increased by repeated filtration. This approach could facilitate  
603 developmental studies that focus on a wide range of stage-specific genetic, physiological, and  
604 behavioral mechanisms.  
605

## 606 Acknowledgements

607 Maggie Kerner contributed technical assistance to the research.

## 608 References

- 609 1. Kaletta T, Hengartner MO. Finding function in novel targets: *C. elegans* as a model  
610 organism. *Nature Reviews Drug Discovery*. 2006.
- 611 2. Markaki M, Tavernarakis N. *Caenorhabditis elegans* as a model system for human  
612 diseases. *Curr Opin Biotechnol* [Internet]. 2020;63(Table 1):118–25. Available from:  
613 <https://doi.org/10.1016/j.copbio.2019.12.011>
- 614 3. Ardiel EL, Rankin CH. An elegant mind: Learning and memory in *Caenorhabditis elegans*.  
615 Vol. 17, *Learning and Memory*. 2010. p. 191–201.
- 616 4. Faumont S, Lindsay TH, Lockery SR. Neuronal microcircuits for decision making in *C.*  
617 *elegans*. Vol. 22, *Current Opinion in Neurobiology*. 2012. p. 580–91.
- 618 5. Porta-de-la-Riva M, Fontrodona L, Villanueva A, Cerón J. Basic *Caenorhabditis elegans*  
619 Methods: Synchronization and Observation. *J Vis Exp* [Internet]. 2012 Jun 10 [cited 2022

- 620 May 10];(64). Available from: /pmc/articles/PMC3607348/  
621 6. Pulak R. Techniques for analysis, sorting, and dispensing of *C. elegans* on the COPAS  
622 flow-sorting system. *Methods Mol Biol.* 2006;351:275–86.  
623 7. Atakan HB, Ayhan F, Gijs MAM. PDMS filter structures for size-dependent larval sorting  
624 and on-chip egg extraction of: *C. elegans*. *Lab Chip.* 2020;20(1):155–67.  
625 8. Ai X, Zhuo W, Liang Q, Mcgrath PT, Lu H. *Lab on a Chip.* 2014;1746–52.  
626 9. Dong L, Cornaglia M, Lehnert T, Gijs MAM. Versatile size-dependent sorting of *C. elegans*  
627 nematodes and embryos using a tunable microfluidic filter structure. *Lab Chip.*  
628 2016;16(3):574–85.  
629 10. Solvas XCI, Geier FM, Leroi AM, Bundy JG, Edel JB, DeMello AJ. High-throughput age  
630 synchronisation of *Caenorhabditis elegans*. *Chem Commun.* 2011;47(35):9801–3.  
631 11. Wang X, Ge A, Hu L, Feng X, Du W, Liu BF. A microfluidic microfilter chip driven by  
632 electrotaxis and fluid flow for size-dependent *C. elegans* sorting with high purity and  
633 efficiency. *Sensors Actuators, B Chem [Internet].* 2018;260:311–9. Available from:  
634 <http://dx.doi.org/10.1016/j.snb.2018.01.077>  
635 12. Yang L, Hong T, Zhang Y, Arriola JGS, Nelms BL, Mu R, et al. A microfluidic diode for  
636 sorting and immobilization of *Caenorhabditis elegans*. *Biomed Microdevices.*  
637 2017;19(2):1–11.  
638 13. Han B, Kim D, Ko UH, Shin JH. A sorting strategy for *C. elegans* based on size-dependent  
639 motility and electrotaxis in a micro-structured channel. *Lab Chip.* 2012;12(20):4128–34.  
640 14. Rezai P, Salam S, Selvaganapathy PR, Gupta BP. Electrical sorting of *Caenorhabditis*  
641 *elegans*. *Lab Chip.* 2012;12(10):1831–40.  
642 15. Wang X, Hu R, Ge A, Hu L, Wang S, Feng X, et al. Highly efficient microfluidic sorting  
643 device for synchronizing developmental stages of *C. elegans* based on deflecting  
644 electrotaxis. *Lab Chip.* 2015;15(11):2513–21.  
645 16. Manière X, Lebois F, Matic I, Ladoux B, Di Meglio JM, Hersen P. Running worms: *C.*  
646 *elegans* self-sorting by electrotaxis. *PLoS One.* 2011;6(2).  
647 17. Sofela S, Sahloul S, Rafeie M, Kwon T, Han J, Warkiani ME, et al. High-throughput sorting  
648 of eggs for synchronization of: *C. elegans* in a microfluidic spiral chip. *Lab Chip.*  
649 2018;18(4):679–87.  
650 18. Xu Y, Hashmi A, Yu G, Lu X, Kwon HJ, Chen X, et al. Microbubble array for on-chip worm  
651 processing. *Appl Phys Lett.* 2013;102(2):1–6.  
652 19. Zhu Z, Chen W, Tian B, Luo Y, Lan J, Wu D, et al. Using microfluidic impedance cytometry  
653 to measure *C. elegans* worms and identify their developmental stages. *Sensors*  
654 *Actuators, B Chem.* 2018;275(June):470–82.  
655 20. Mutwakil MHAZ, Steele TJG, Lowe KC, De Pomerai DI. Surfactant stimulation of growth in  
656 the nematode *Caenorhabditis elegans*. *Enzyme Microb Technol.* 1997;20(6):462–70.  
657 21. Spensley M, Del Borrello S, Pajkic D, Fraser AG. Acute effects of drugs on *Caenorhabditis*  
658 *elegans* movement reveal complex responses and plasticity. *G3 Genes, Genomes, Genet.*  
659 2018;8(9):2941–52.  
660 22. Stiernagle T. Maintenance of *C. elegans*. *WormBook : the online review of C. elegans*  
661 *biology.* 2006.  
662 23. *WormAtlas [Internet].* [cited 2022 Jan 1]. Available from: <https://www.wormatlas.org/>  
663 24. *Logistic regression [Internet].* [cited 2023 Jan 6]. Available from:

664 [https://en.wikipedia.org/wiki/Logistic\\_regression](https://en.wikipedia.org/wiki/Logistic_regression)  
665 25. Ludwick JC, Henderson PL. Particle shape and inference of size from sieving.  
666 *Sedimentology*. 1968;11:197–235.  
667

## 668 **Supporting information**

669 **S1 Fig. Width-length curve.** *Widths* of each stage were taken from measurements in Table 1 of Atakan et al. [7].  
670 *Lengths* of each stage were the center of the length ranges that define each stage according to data in WormAtlas  
671 [23]. The data are fit by the equation  $w = 0.055l - 3.53$ , where  $w$  is width and  $l$  is length.  
672

673 **S2 Fig. Scaling procedure used to constrain limiting values of  $p'(l)$ .** *Red trace*, the ratio  $H_f(l)/H_u(l)$  is plotted  
674 against length for one run of 30  $\mu\text{m}$  retention. *Blue trace*, the same data after scaling  $y$ -values by  $1/X_n$ , with  $n = 9$ .  
675 The value of  $n$  was chosen by trial and error to optimize the fit of the logistic function to the mean of all runs in the  
676 30  $\mu\text{m}$  retention data set.  
677

678 **S1 Table 1. Filter-function parameters for fits of equations 3 and 4 to the data in the indicated figures.** Column  $n$   
679 contains the number of values used to define the asymptotic region of the data during the fitting procedure.  
680

681 **S2 Table 2. Examples of available nylon mesh sizes.** <sup>a</sup>Component Supply, Sparta, TN, 38583 USA. <sup>b</sup>pluriSelect, El  
682 Cajon, CA, 92020 USA. <sup>c</sup>Funakoshi, Tokyo, Japan.  
683

684 **S1 Video. Worms caught by the cell-strainer mesh.** After 1-step retention, 40  $\mu\text{m}$  filtration, the strainer was flushed  
685 in the usual way to recover worms from the top surface of the mesh. It was then submerged in M9 buffer. Inspection  
686 of the mesh on a stereomicroscope revealed worms whose heads were caught in the mesh. Their tails exhibited  
687 normal swimming movements (*red arrows*). The video also shows a swimming worm that gets caught in the mesh  
688 ( $t = 15$  sec, *blue arrow*), suggesting that worms actively interact with the mesh in some cases.  
689

A

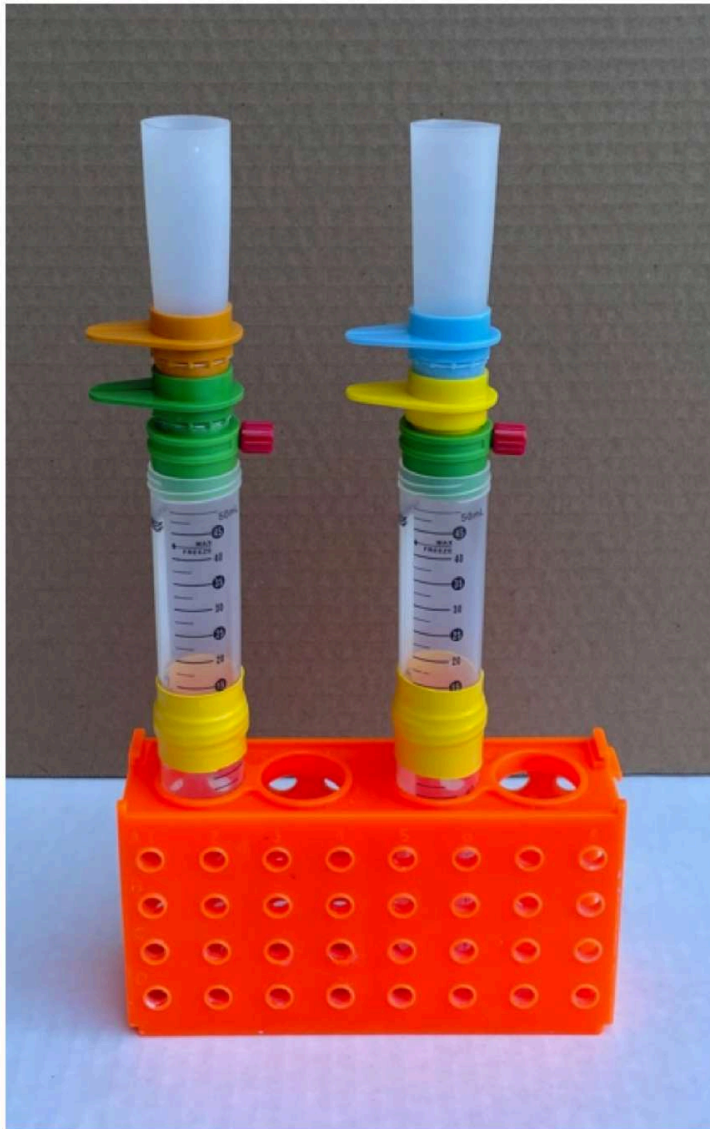

B

30  $\mu\text{m}$ 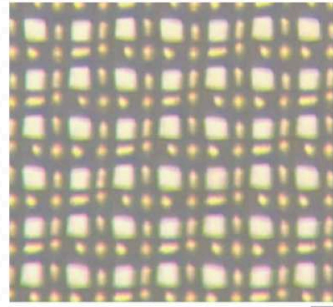40  $\mu\text{m}$ 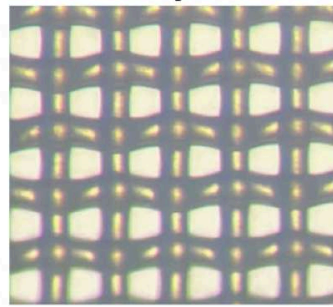50  $\mu\text{m}$ 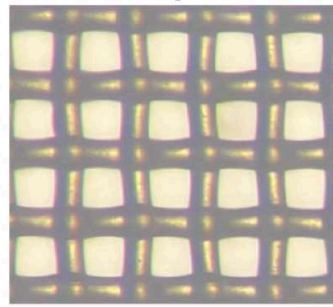

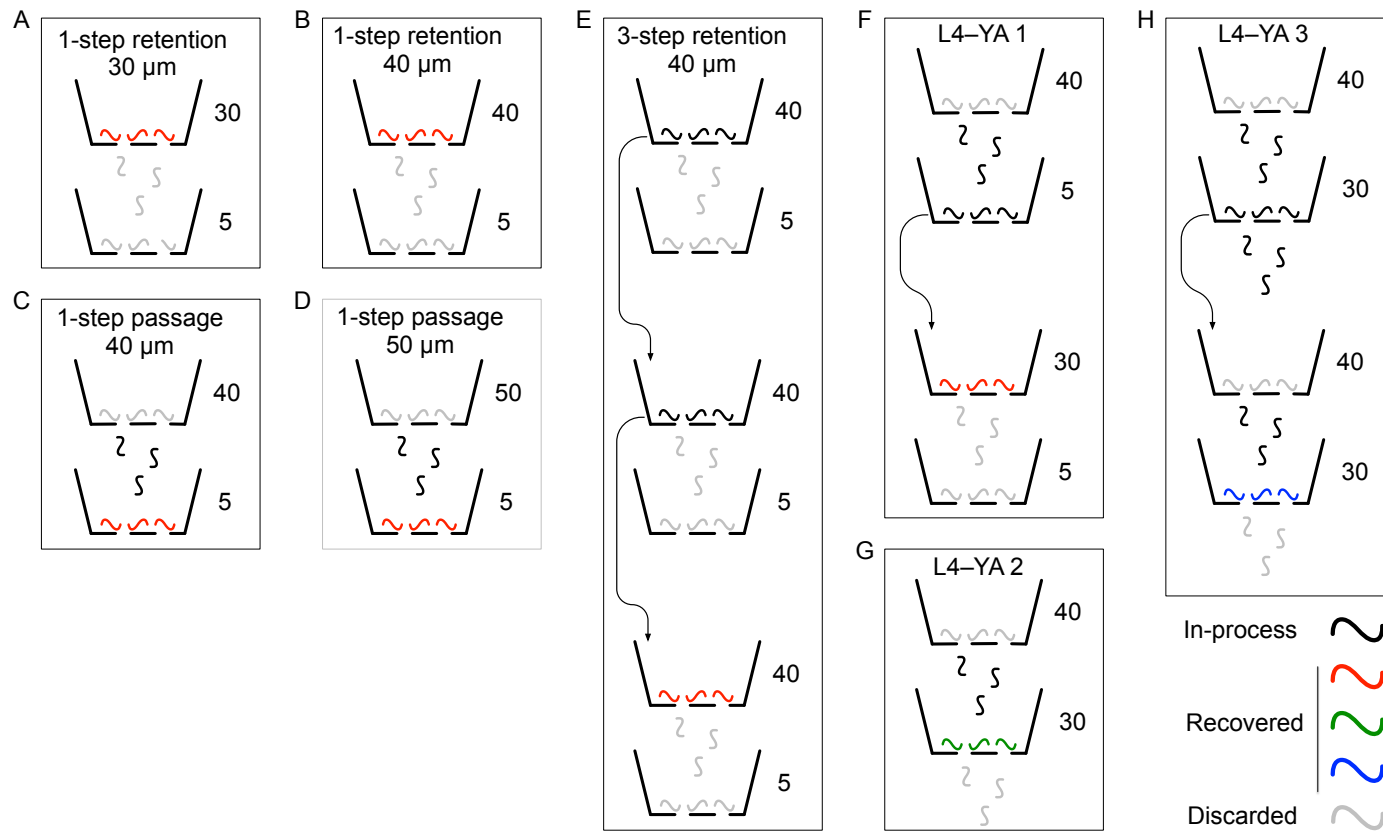

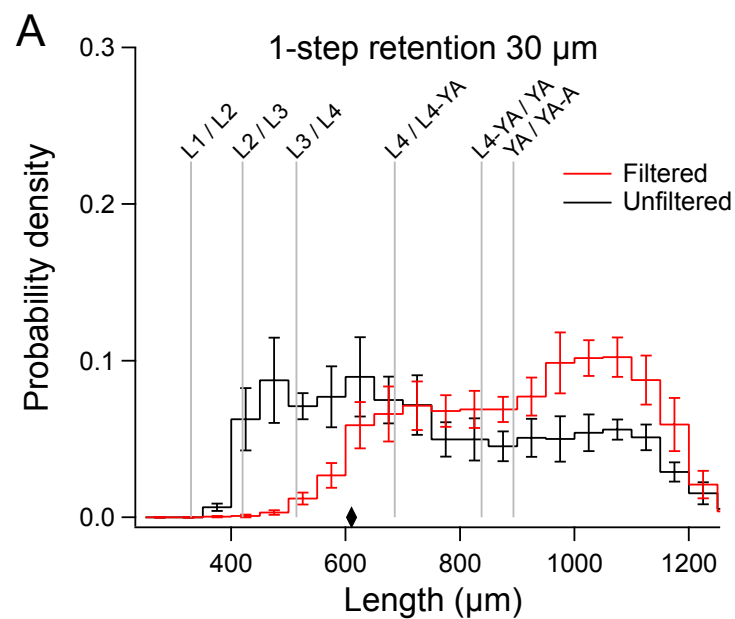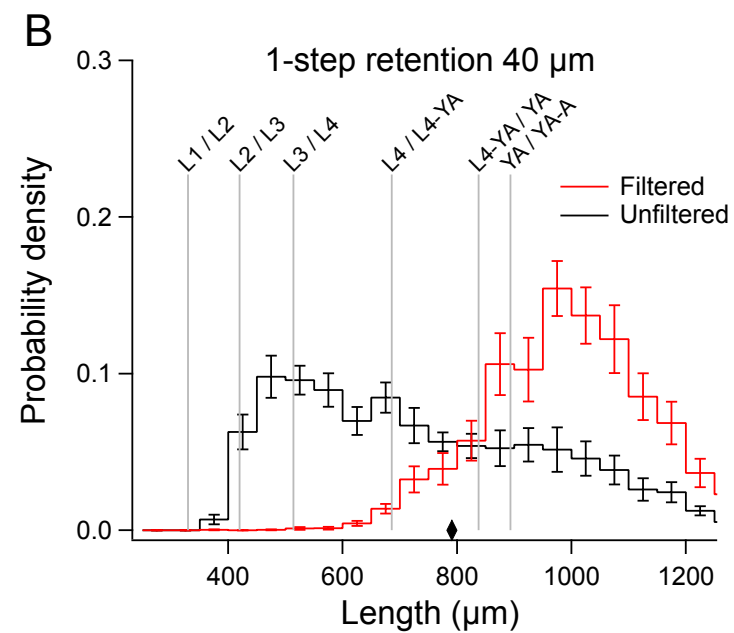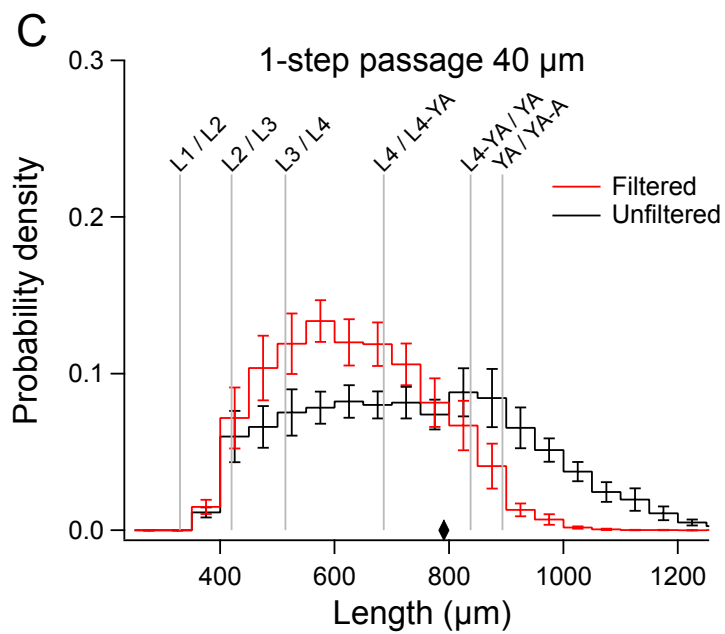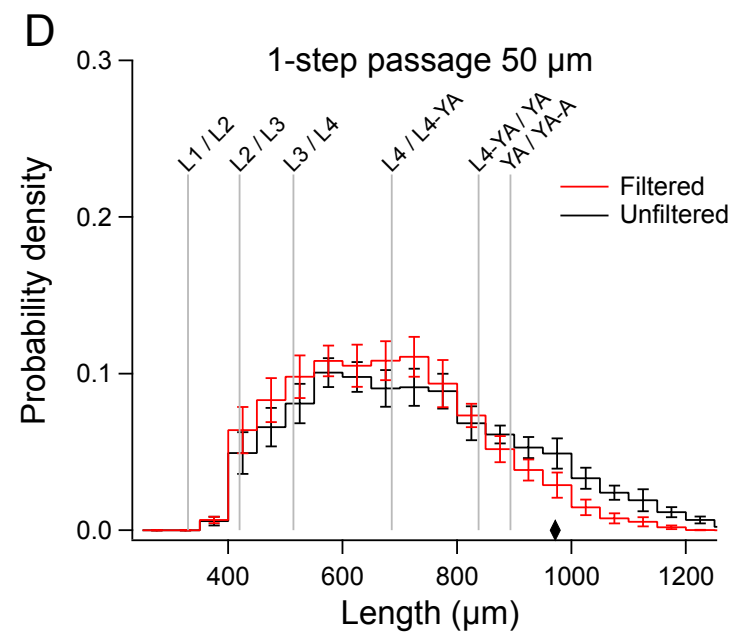

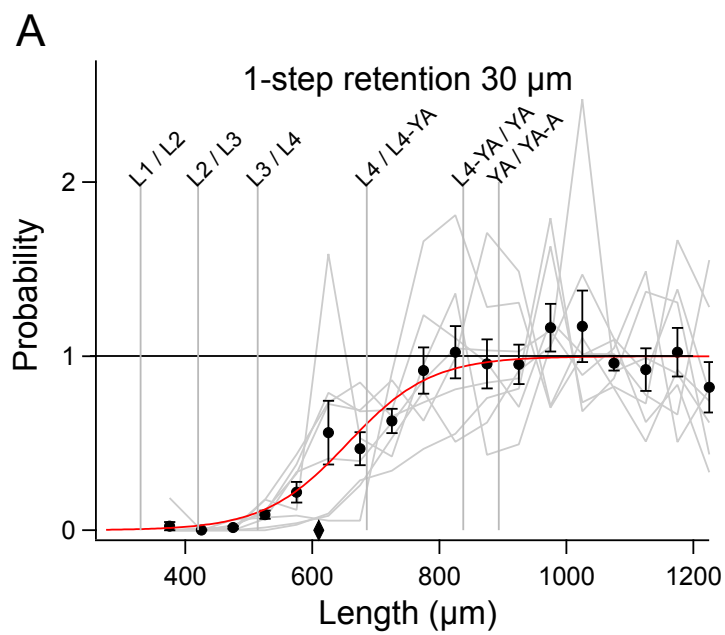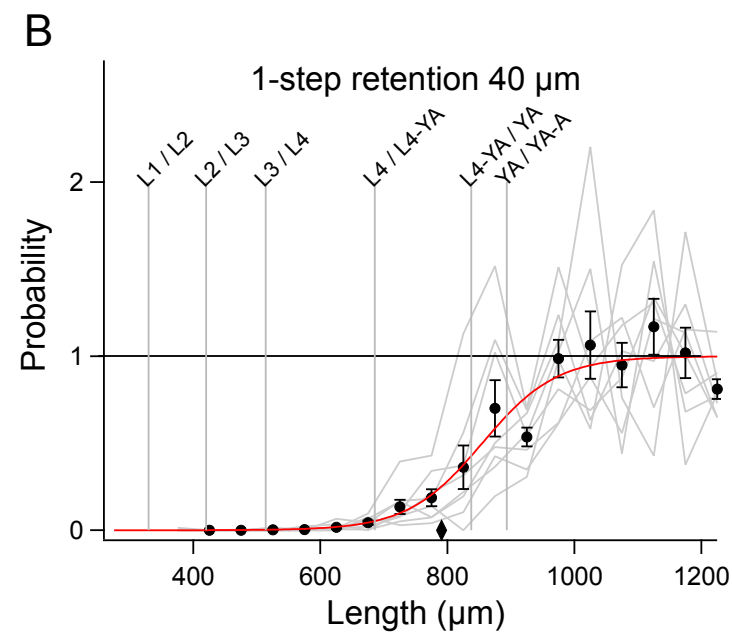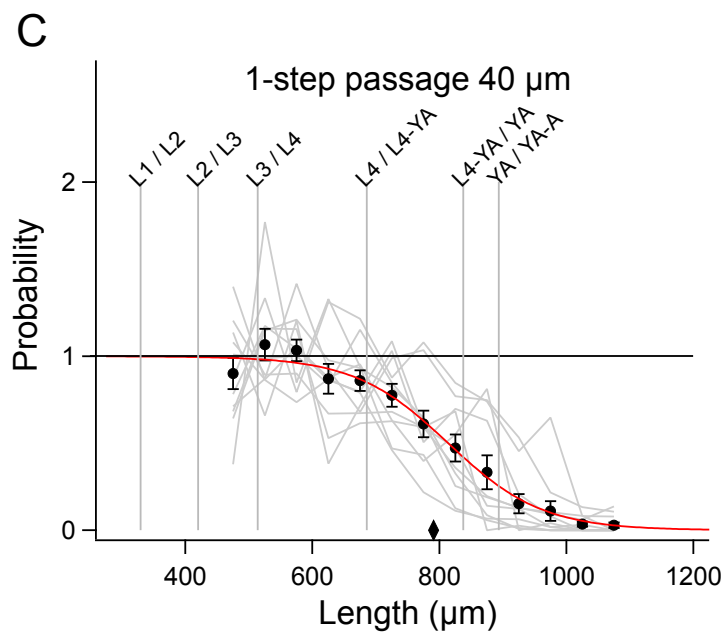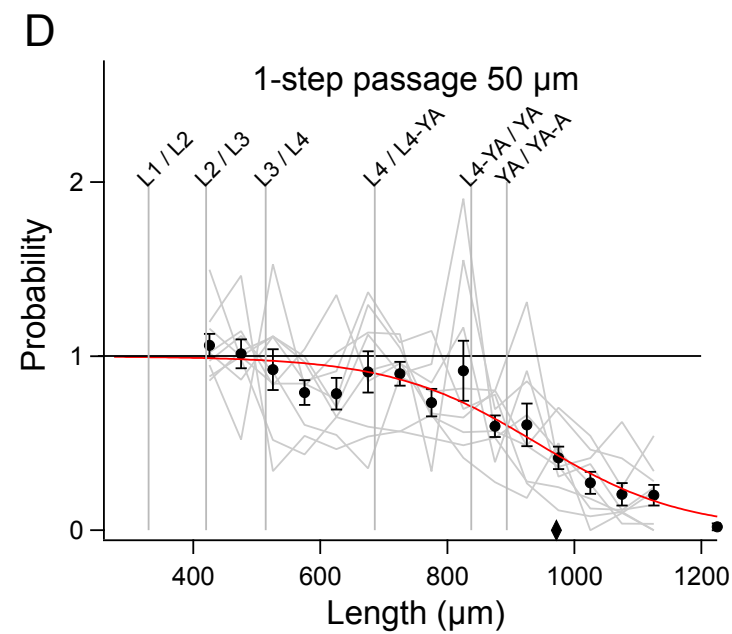



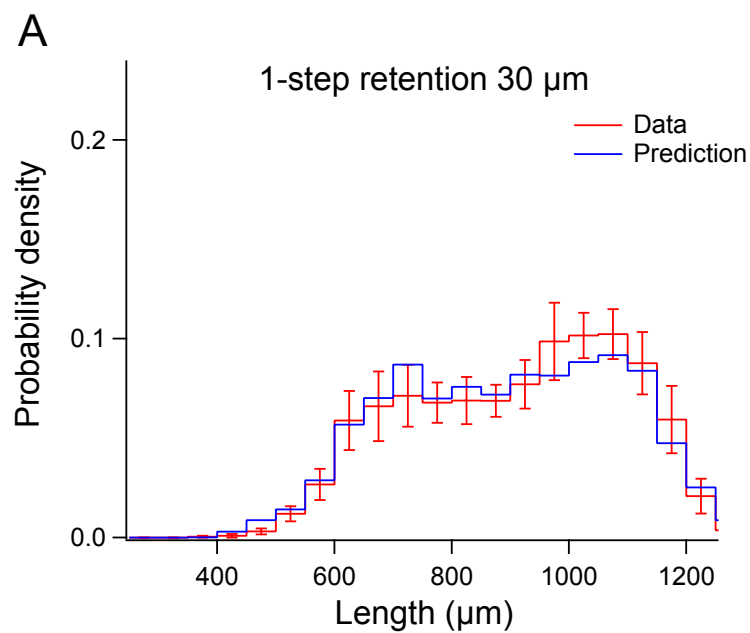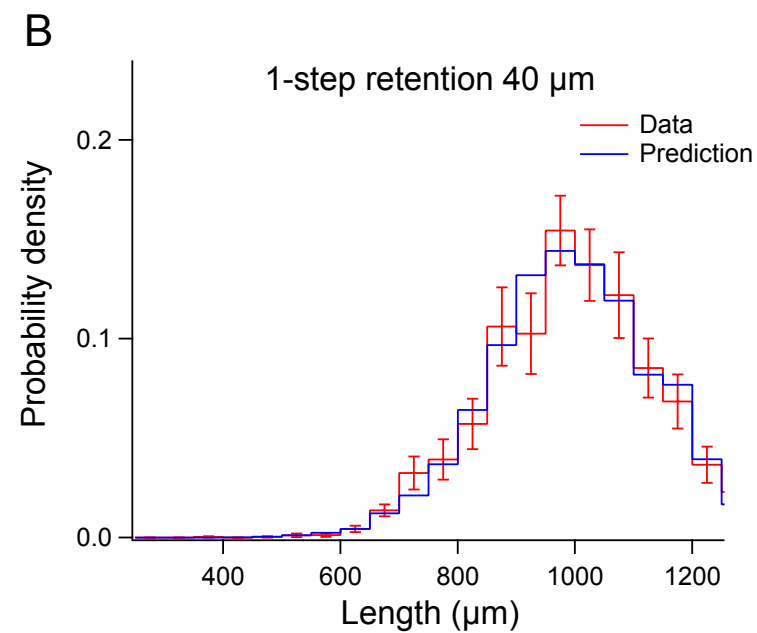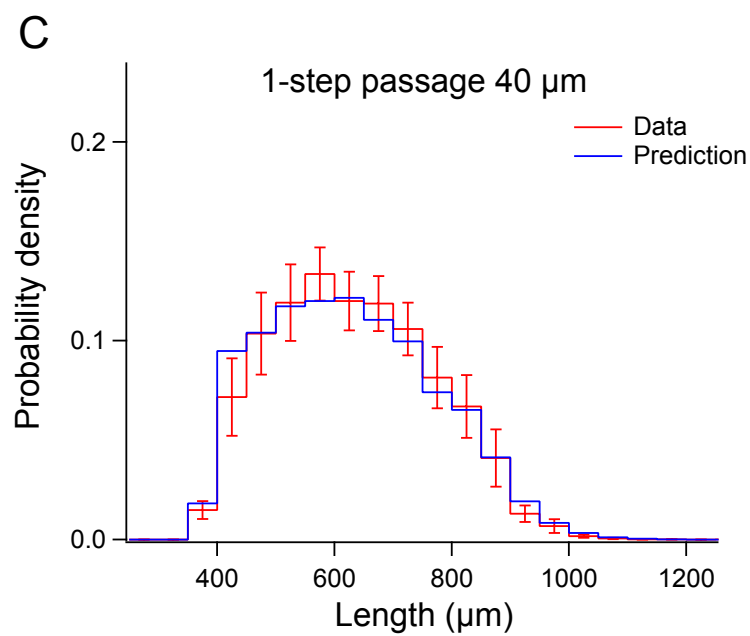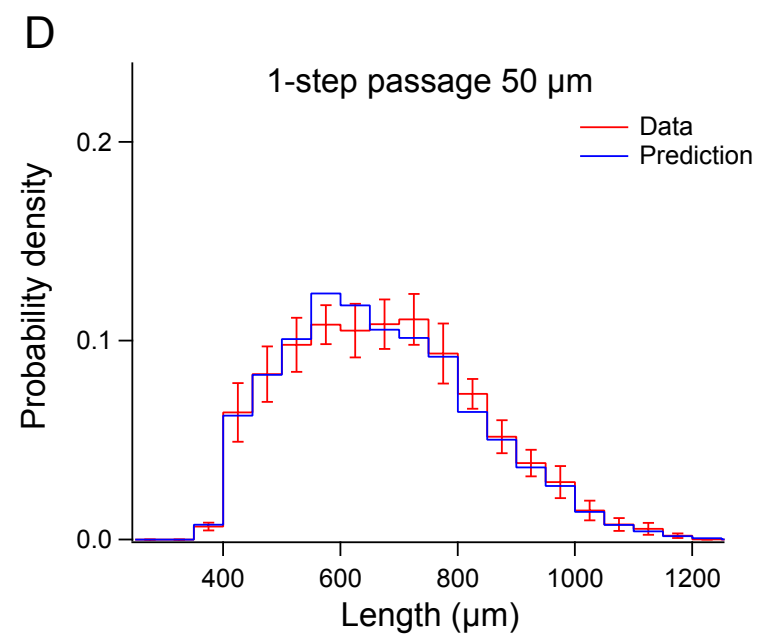

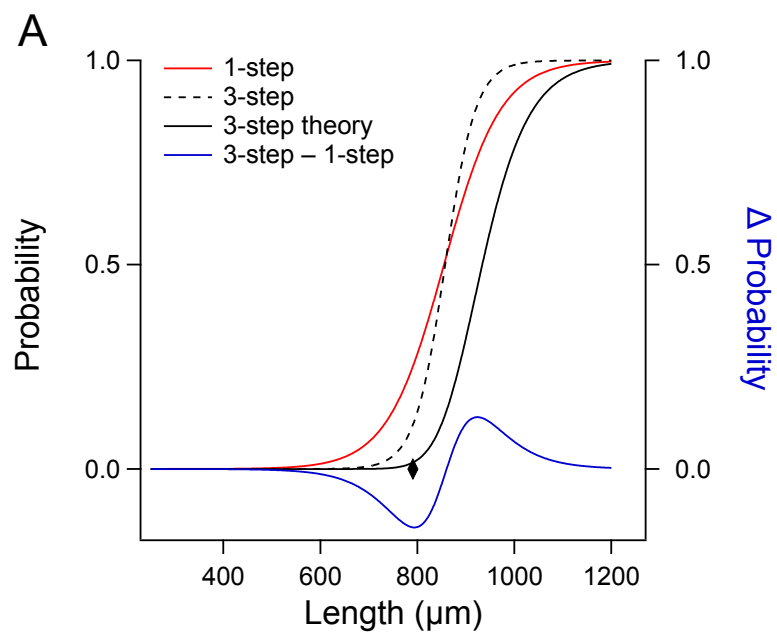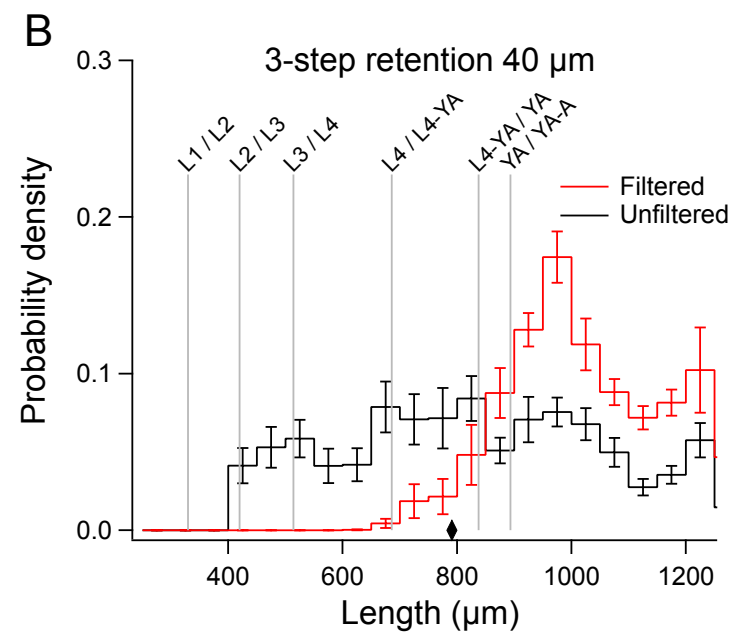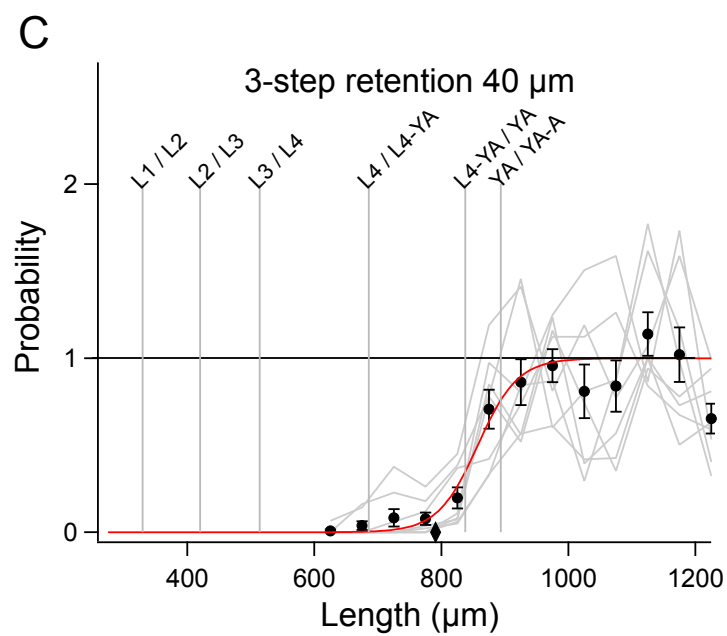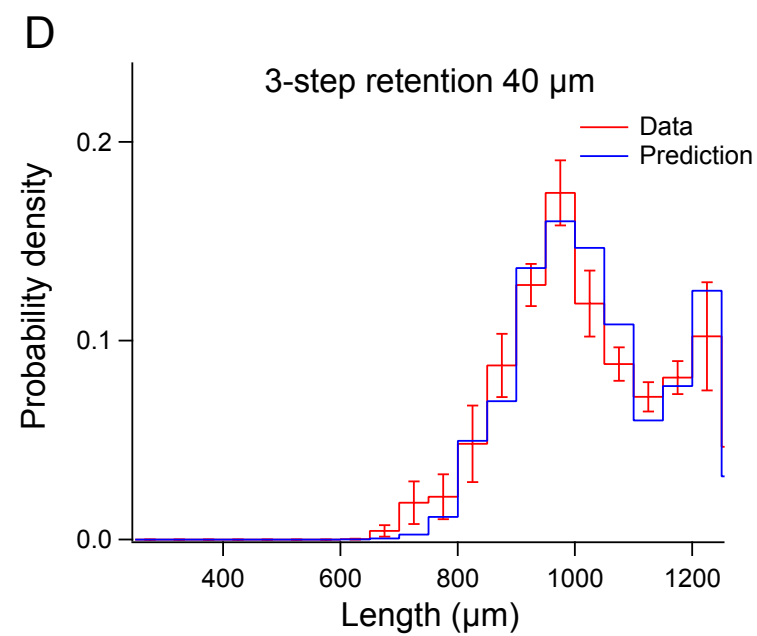

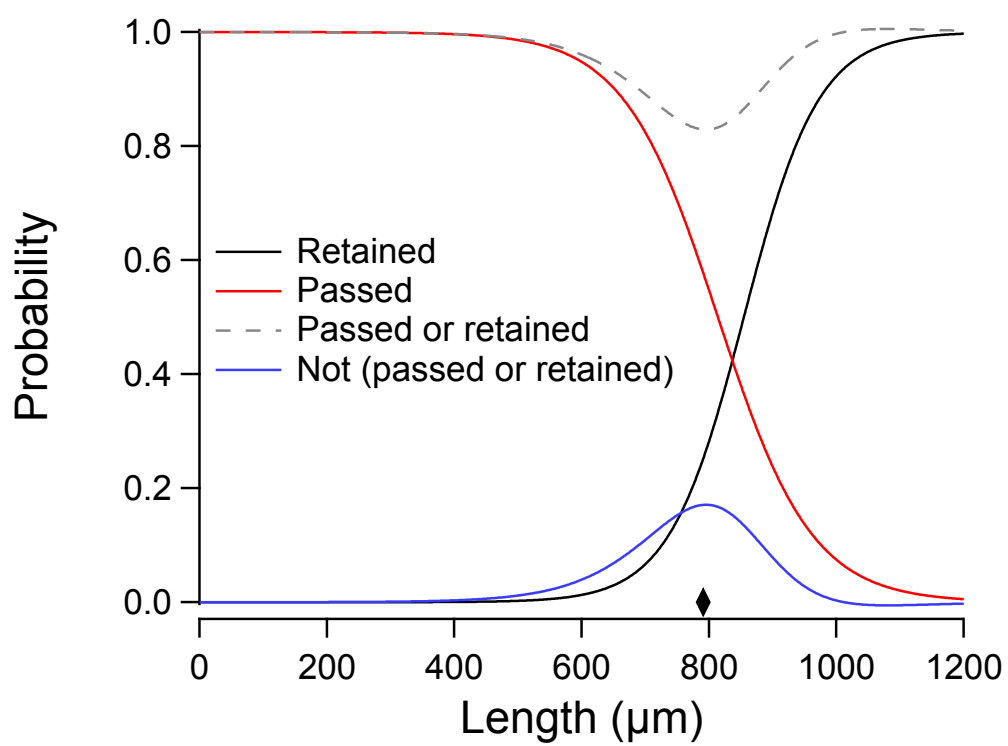

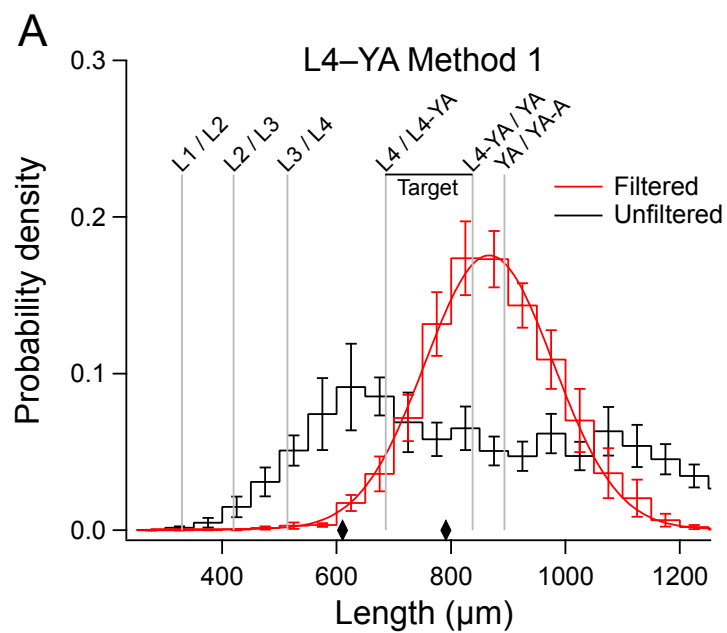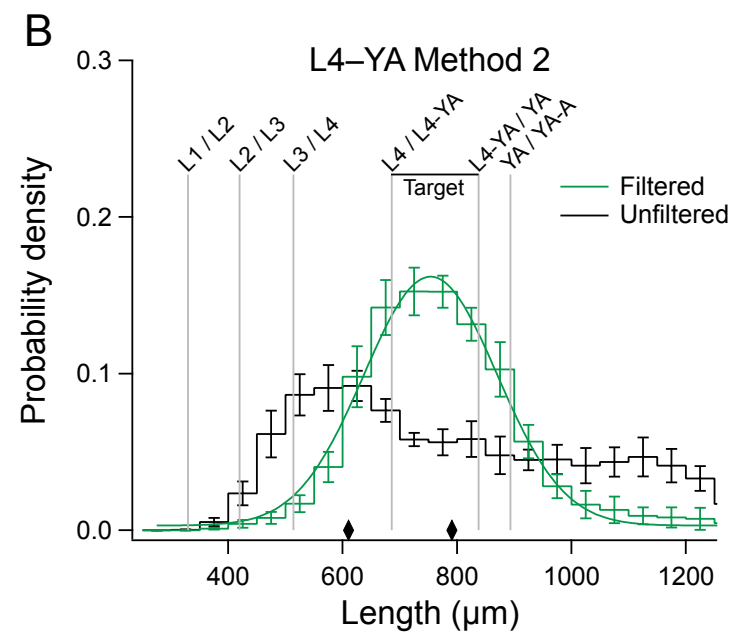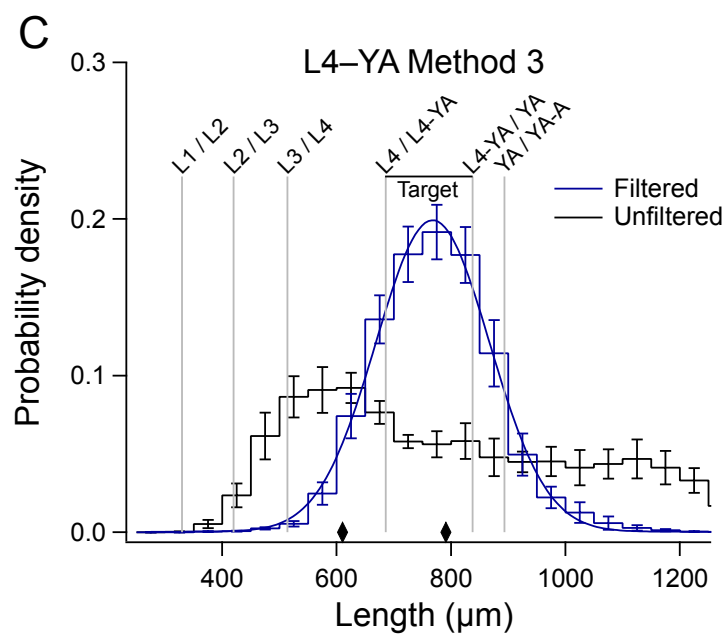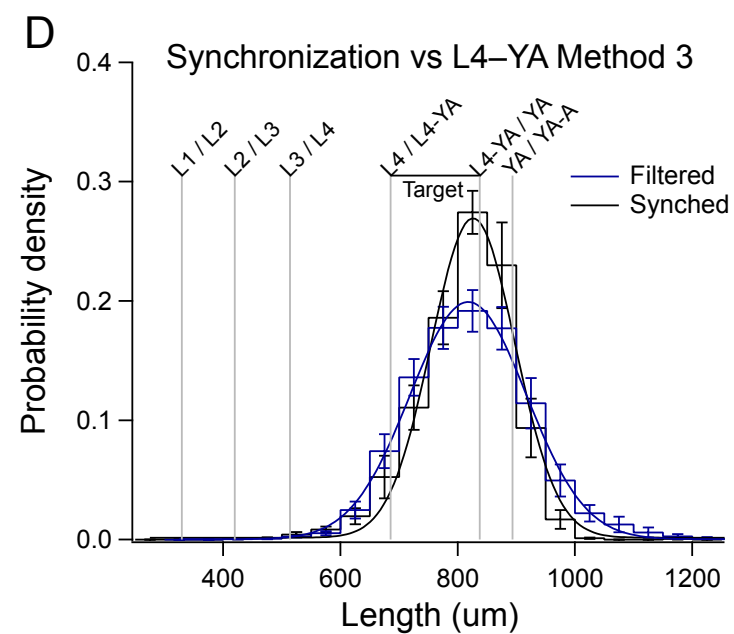

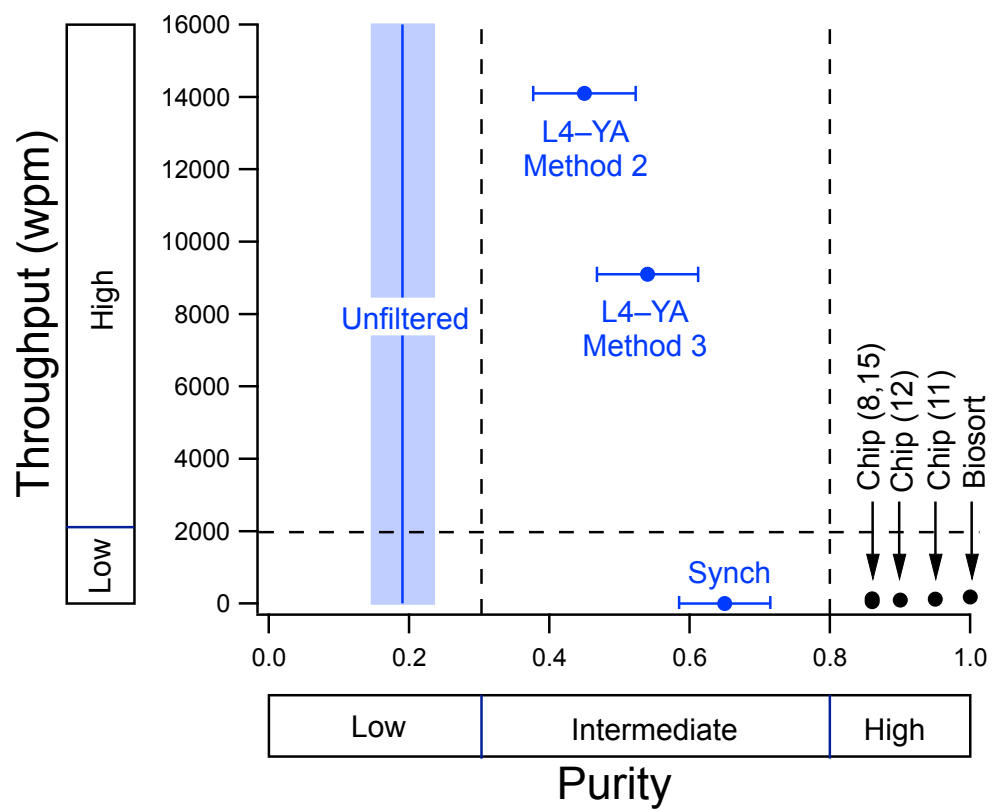

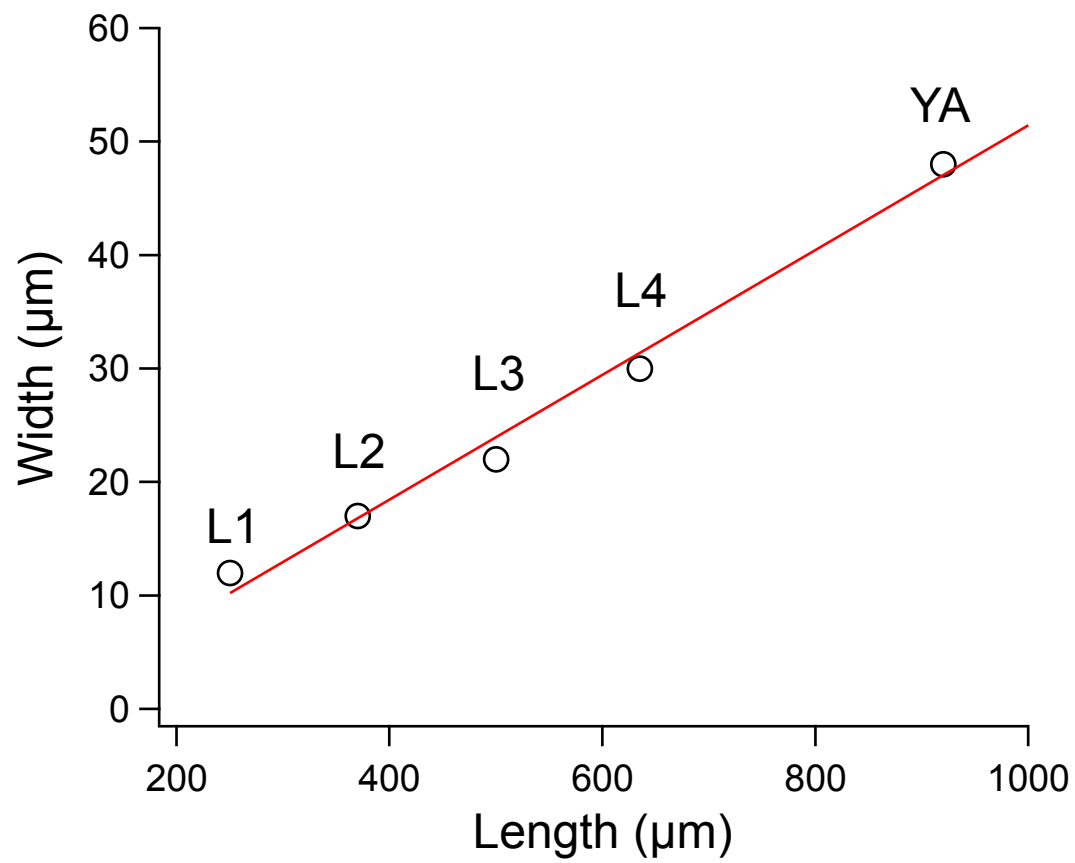

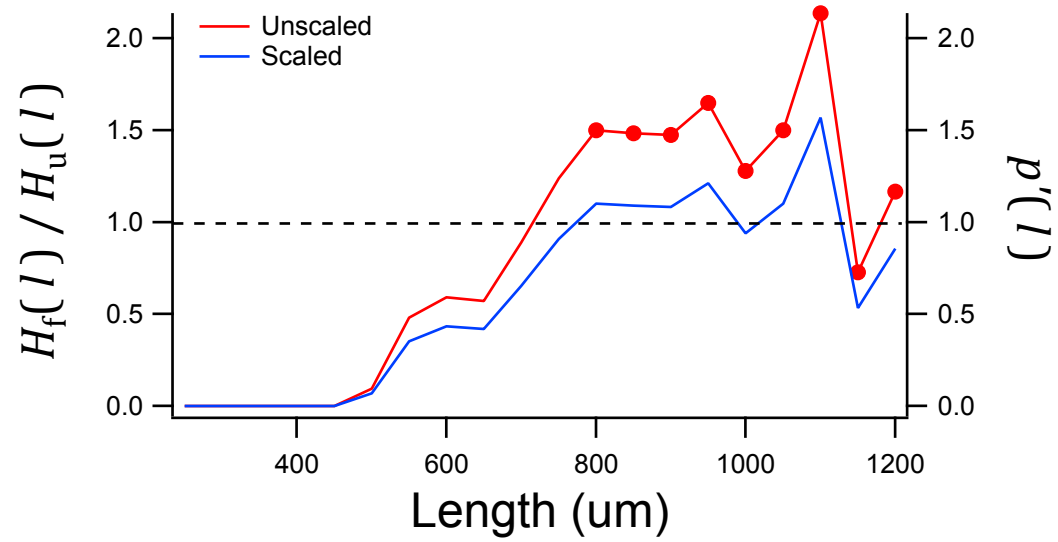

**S1 Table. Filter-function parameters for fits to the data in the indicated figures.**

| <b>Filtration mode</b> | <b>Mesh size (<math>\mu\text{m}</math>)</b> | <b>Figure</b> | <b><math>I_0</math></b> | <b><math>s</math></b> | <b><math>n</math></b> |
|------------------------|---------------------------------------------|---------------|-------------------------|-----------------------|-----------------------|
| Retained               | 30                                          | 4A            | 655                     | 65.6                  | 9                     |
| Retained               | 40                                          | 4B            | 855                     | 58.6                  | 3                     |
| Passed                 | 40                                          | 4C            | 814                     | 73.8                  | 3                     |
| Passed                 | 50                                          | 4D            | 942                     | 115                   | 3                     |
| Retained               | 40                                          | 7C            | 857                     | 31.5                  | 4                     |



**S2 Table. Sample of available nylon mesh sizes.**

| Mesh fabric<br>( $\mu\text{m}$ ) <sup>a</sup> | Cell strainers<br>( $\mu\text{m}$ ) <sup>b</sup> | Cell strainers<br>( $\mu\text{m}$ ) <sup>c</sup> |
|-----------------------------------------------|--------------------------------------------------|--------------------------------------------------|
| 7                                             | 1                                                | 25                                               |
| 10                                            | 5                                                | 40                                               |
| 15                                            | 10                                               | 70                                               |
| 18                                            | 15                                               |                                                  |
| 25                                            | 20                                               |                                                  |
| 31                                            | 30                                               |                                                  |
| 38                                            | 40                                               |                                                  |
| 40                                            | 50                                               |                                                  |
| 44                                            | 60                                               |                                                  |
| 52                                            | 70                                               |                                                  |
| 56                                            | 85                                               |                                                  |
| 60                                            | 100                                              |                                                  |
| 62                                            |                                                  |                                                  |
| 64                                            |                                                  |                                                  |
| 70                                            |                                                  |                                                  |
| 80                                            |                                                  |                                                  |
| 85                                            |                                                  |                                                  |
| 105                                           |                                                  |                                                  |

## Derivation of the logistic function

Let  $p(x)$  be the probability of a favorable outcome in a binary, categorical process, where  $x$  is a continuous variable that predicts  $p$ . By definition, the odds of a favorable outcome are the ratio of the probability of a favorable outcome to the probability of a non-favorable outcome

$$O(x) = \frac{p(x)}{1 - p(x)} \quad (1)$$

In logistic regression, the parameters of a linear equation in  $x$ , such as  $y = (x - \mu)/s$ , are adjusted to fit the probability data  $p(x)$  after transformation as log of the odds of a favorable outcome.

$$\ln [O(x)] = (x - \mu)/s \quad (2)$$

which is equivalent to

$$O(x) = e^{(x-\mu)/s} \quad (3)$$

or

$$\frac{p(x)}{1 - p(x)} = e^{(x-\mu)/s} \quad (4)$$

Solving for  $p(x)$  gives gives the familiar form of the logistic function

$$p(x) = \frac{1}{1 + e^{-(x-\mu)/s}} \quad (5)$$
